# Supplementary material
Source: publisher figshare collection journal article supplement (https://acs.figshare.com/ndownloader/files/4639801)

## Supporting Information

### Direct Vinylation and Difluorovinylation Of Arylboronic Acids using Vinyl- and 2,2-Difluorovinyl Tosylates via the Suzuki-Miyaura Cross Coupling

*Thomas M. Gøgsig, Lina S. Søbjerger, Anders T. Lindhardt (né Hansen), Kim L. Jensen and  
Troels Skrydstup\**

The Center for Insoluble Protein Structures (inSPIN), Department of Chemistry and the  
Interdisciplinary Nanoscience Center, University of Aarhus, Langelandsgade 140,  
8000 Aarhus C, Denmark

**ts@chem.au.dk**

|                                                  |    |
|--------------------------------------------------|----|
| Table of Contents                                | 1  |
| NMR Spectra for compounds <b>2</b> and <b>17</b> | 2  |
| NMR Spectra for Table 2                          | 7  |
| NMR Spectra for Table 3                          | 10 |

## Compound 2

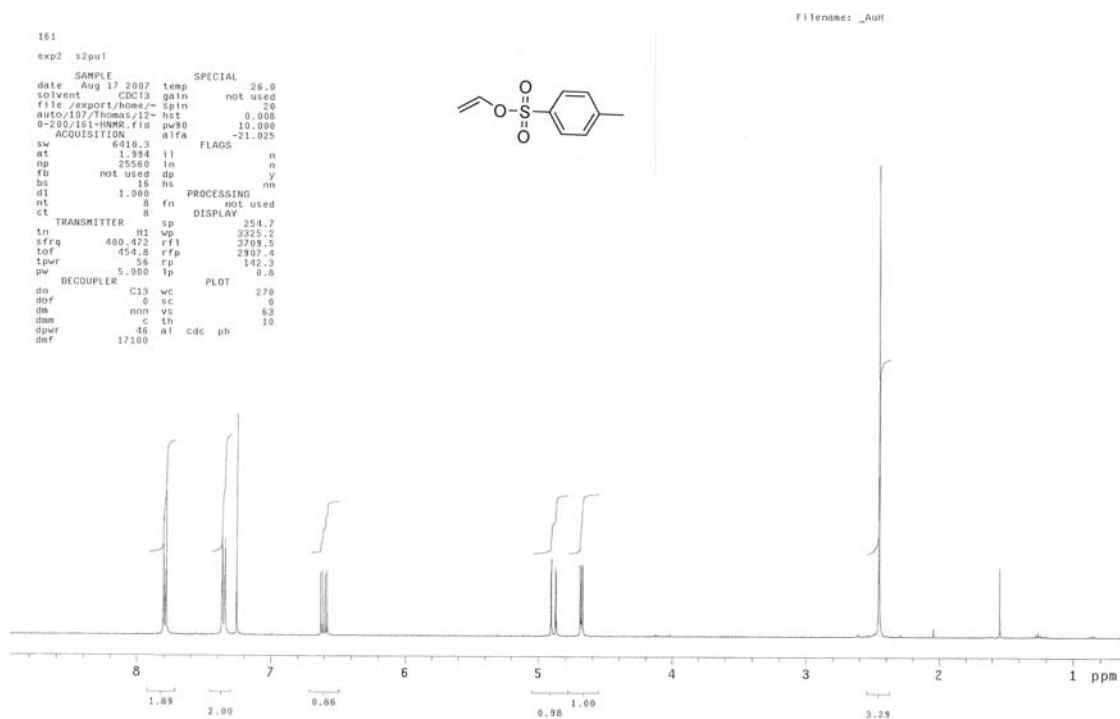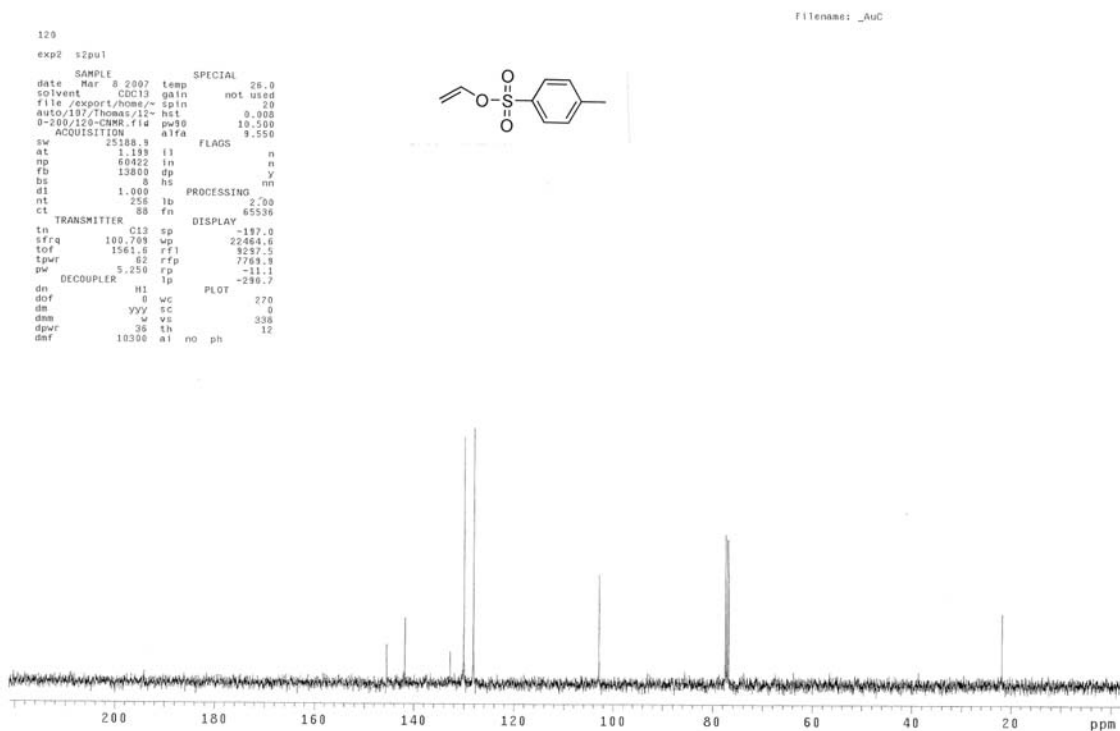

## 2,2,2-Trifluoroethyl tosylate

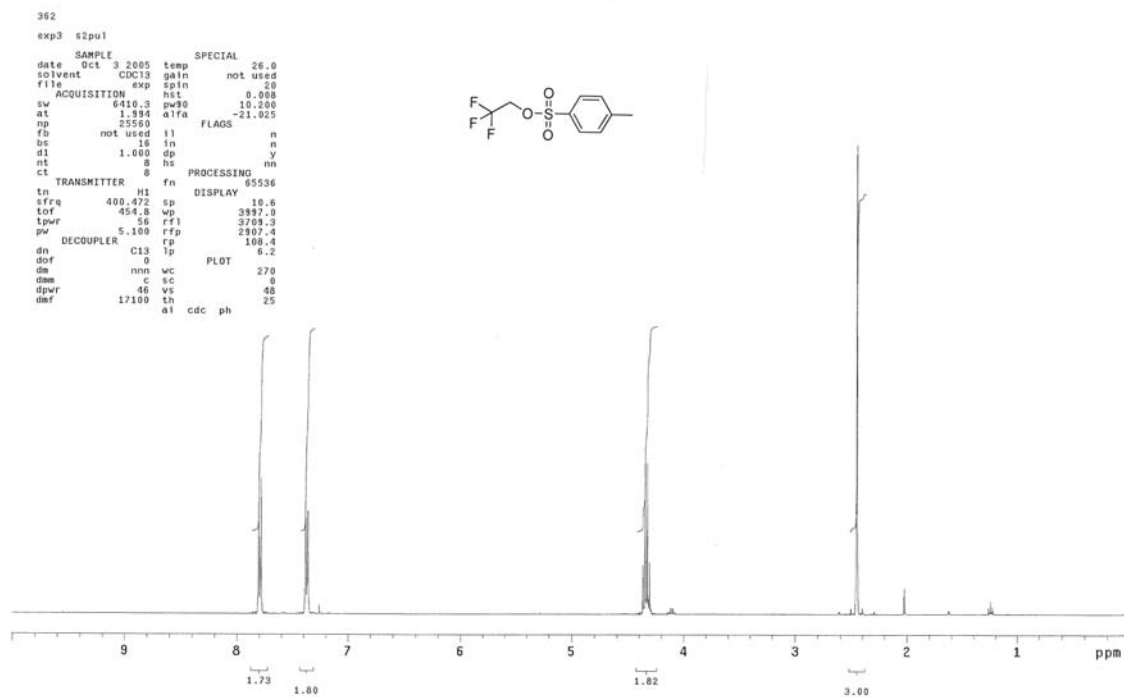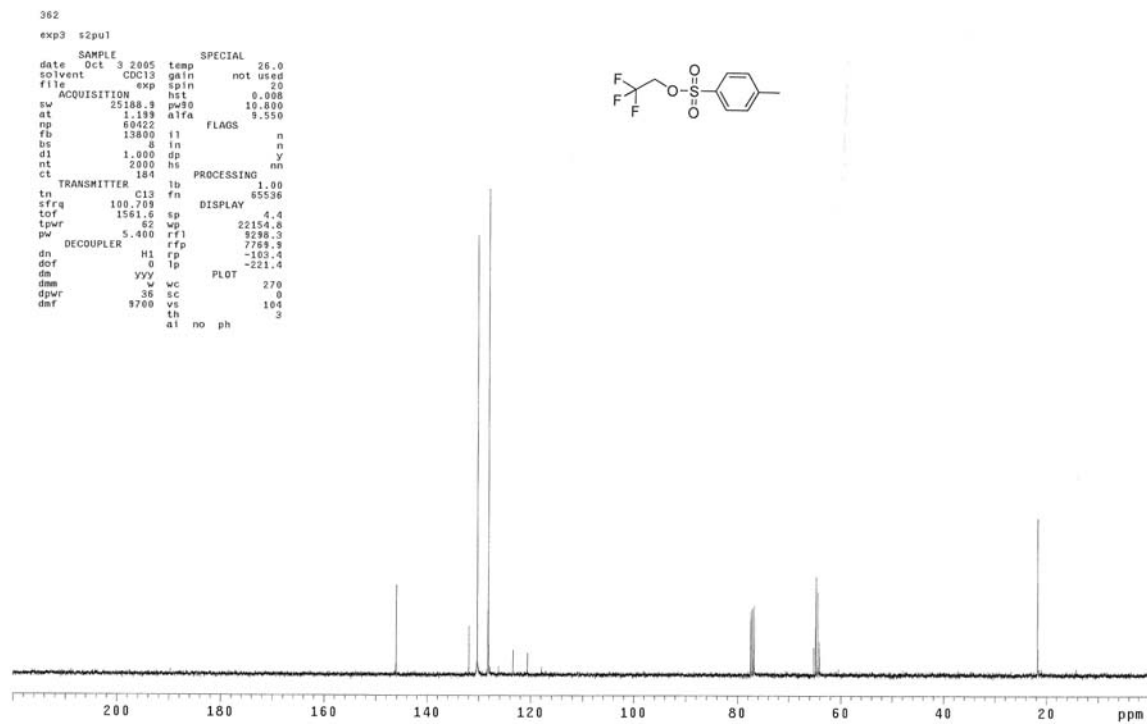

362

exp3 s2pu1

| SAMPLE      |            | SPECIAL |          |
|-------------|------------|---------|----------|
| date        | Oct 3 2005 | temp    | 26.0     |
| solvent     | CDCl3      | gain    | not used |
| file        | exp        | spin    | not used |
| ACQUISITION |            | hst     | 0.000    |
| sw          | 86956.5    | pw90    | 15.790   |
| at          | 0.600      | alfa    | 93.500   |
| np          | 104292     | FLAGS   |          |
| fb          | 47800      | l1      | n        |
| bs          | 16         | in      | n        |
| d1          | 1.500      | dp      | y        |
| nt          | 16         | hs      | nn       |
| ct          | 16         |         |          |
| TRANSMITTER |            | tb      | 1.00     |
| tn          | f19        | lsfid   | -9       |
| rfra        | 376.786    | fn      | 131072   |
| tof         | 8218.0     | DISPLAY |          |
| tpwr        | 57         | sp      | -75506.5 |
| pw          | 5.233      | wp      | 86955.2  |
| DECOUPLER   |            | rf1     | 75507.8  |
| dn          | H1         | rfp     | 0        |
| dof         | 0          | rp      | -79.6    |
| dm          | nnn        | lp      | 0.0      |
| dma         | C          |         |          |
| dpwr        | 36         | wc      | 270      |
| dmf         | 9700       | sc      | 0        |
|             |            | vs      | 2        |
|             |            | th      | 65       |
|             |            | al      | no ph    |

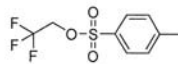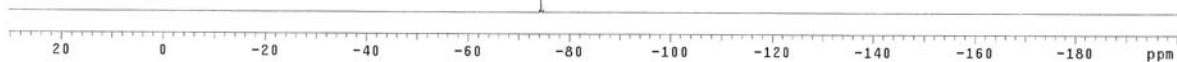

## Compound 17

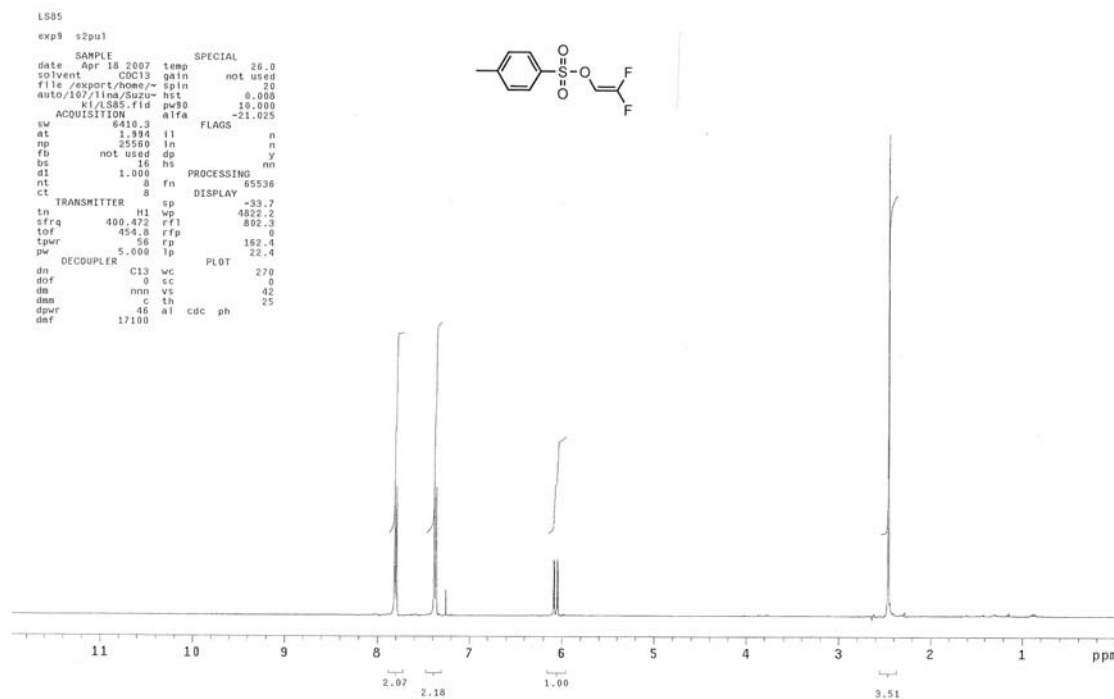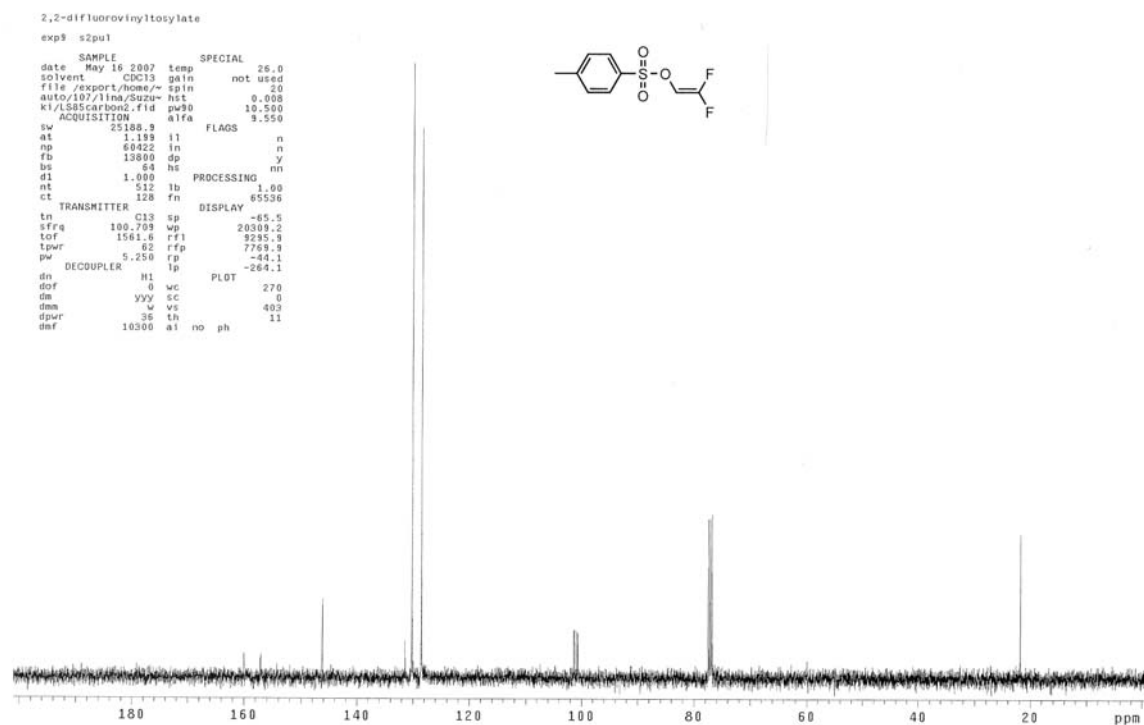

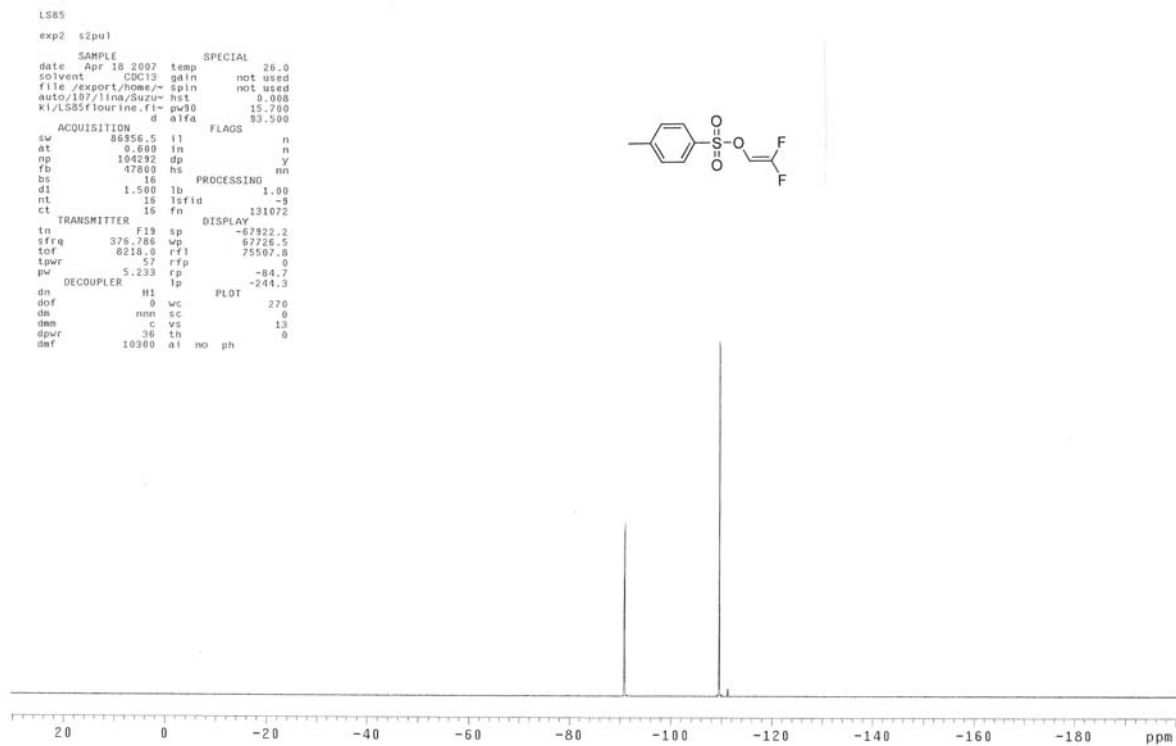

## Compound 8

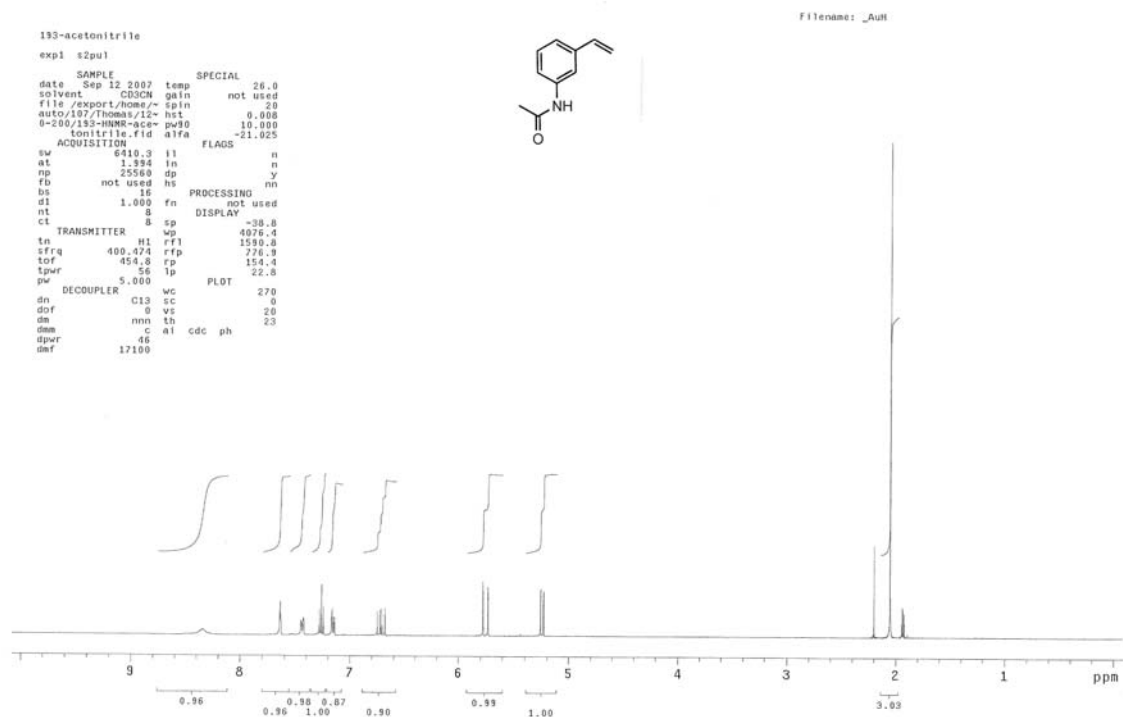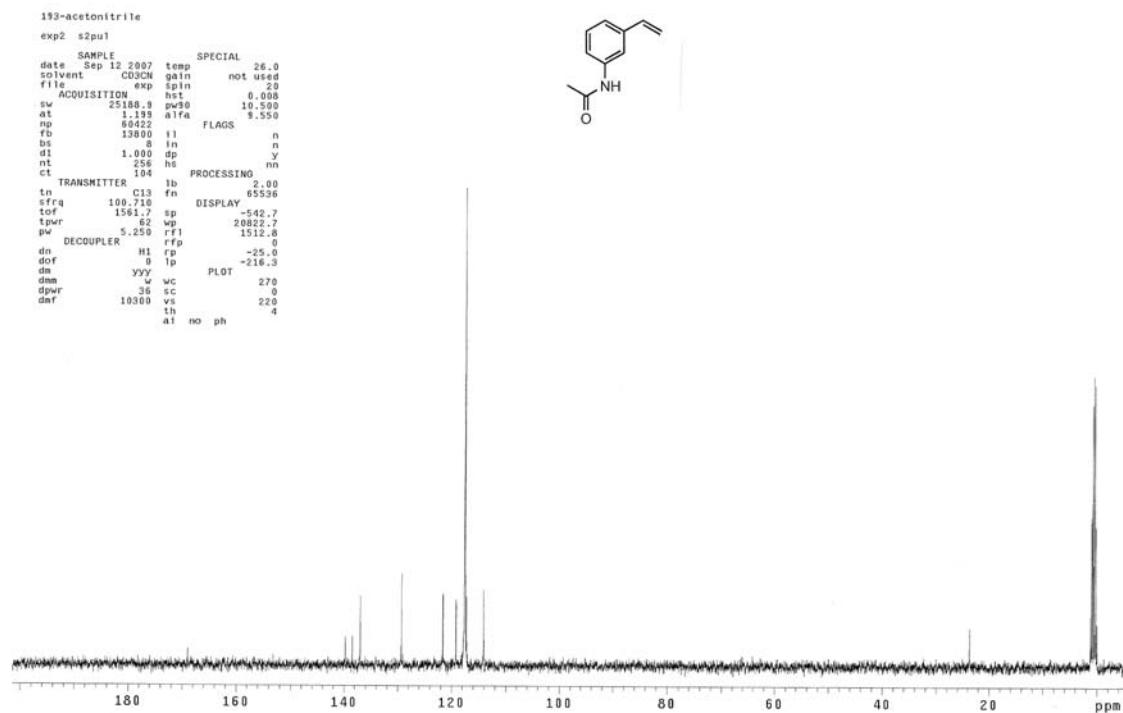

## Compound 4

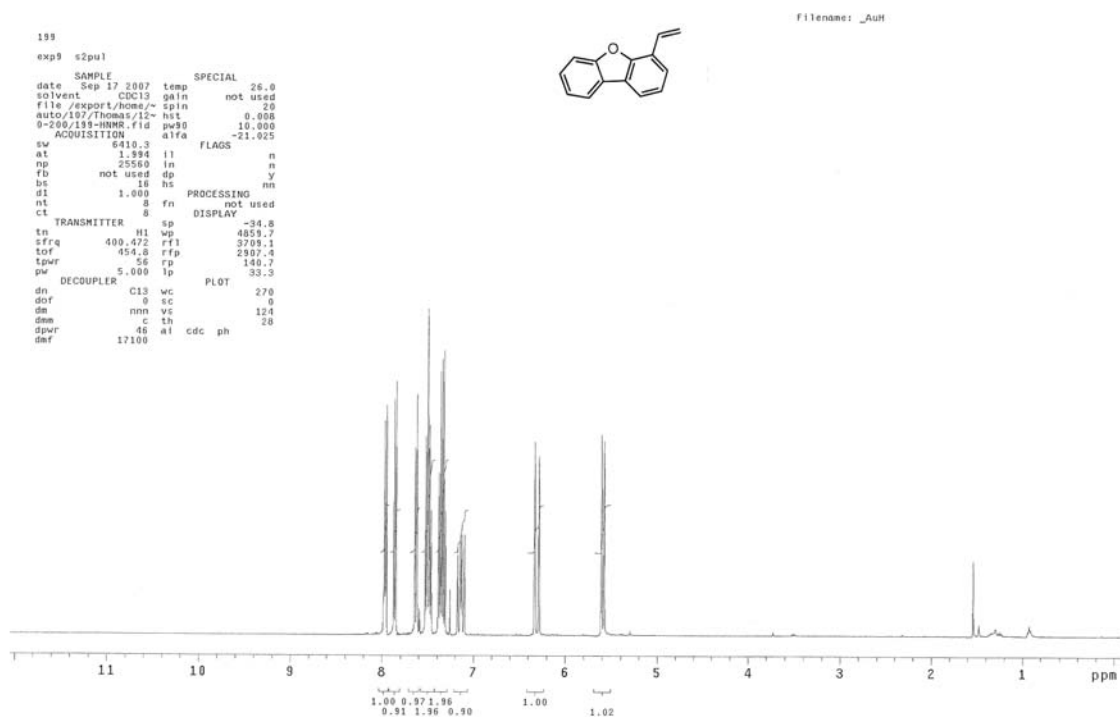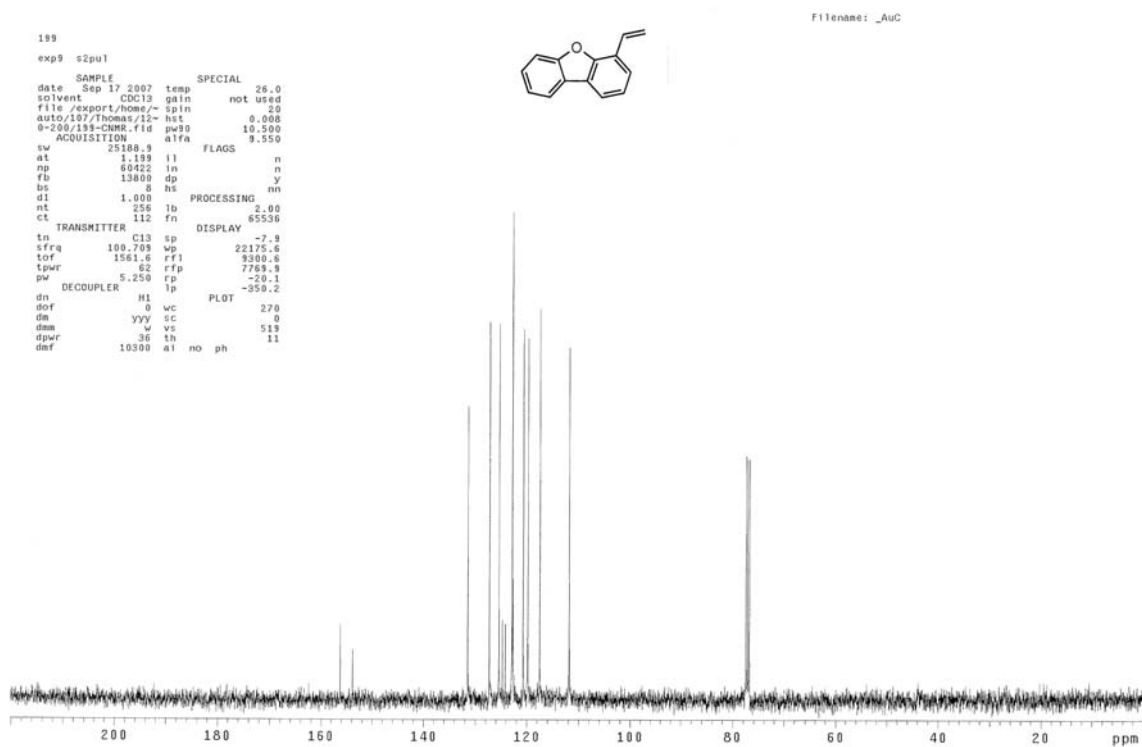



## Compound 13

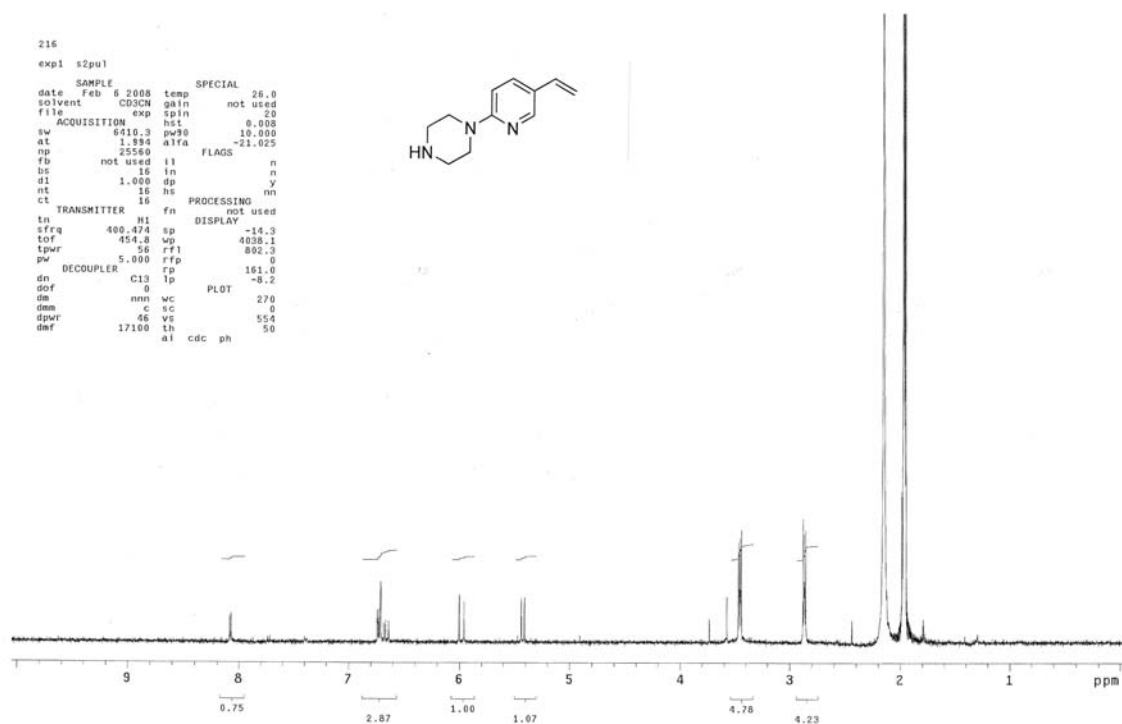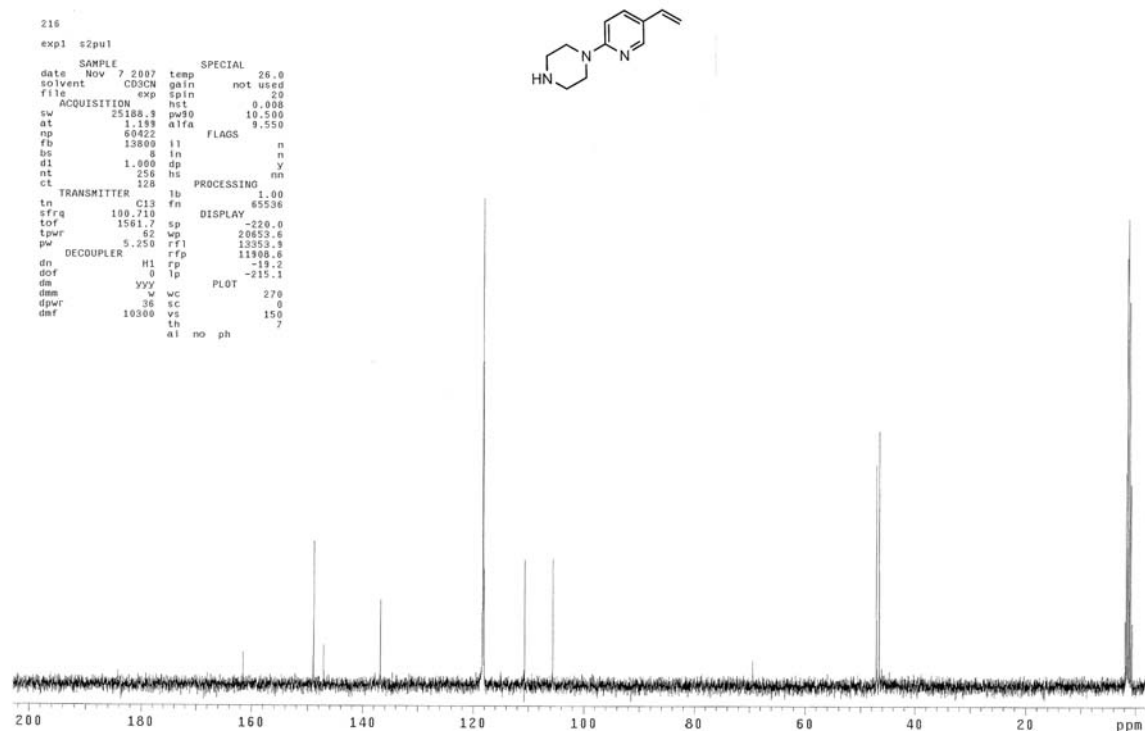

## Compound 18

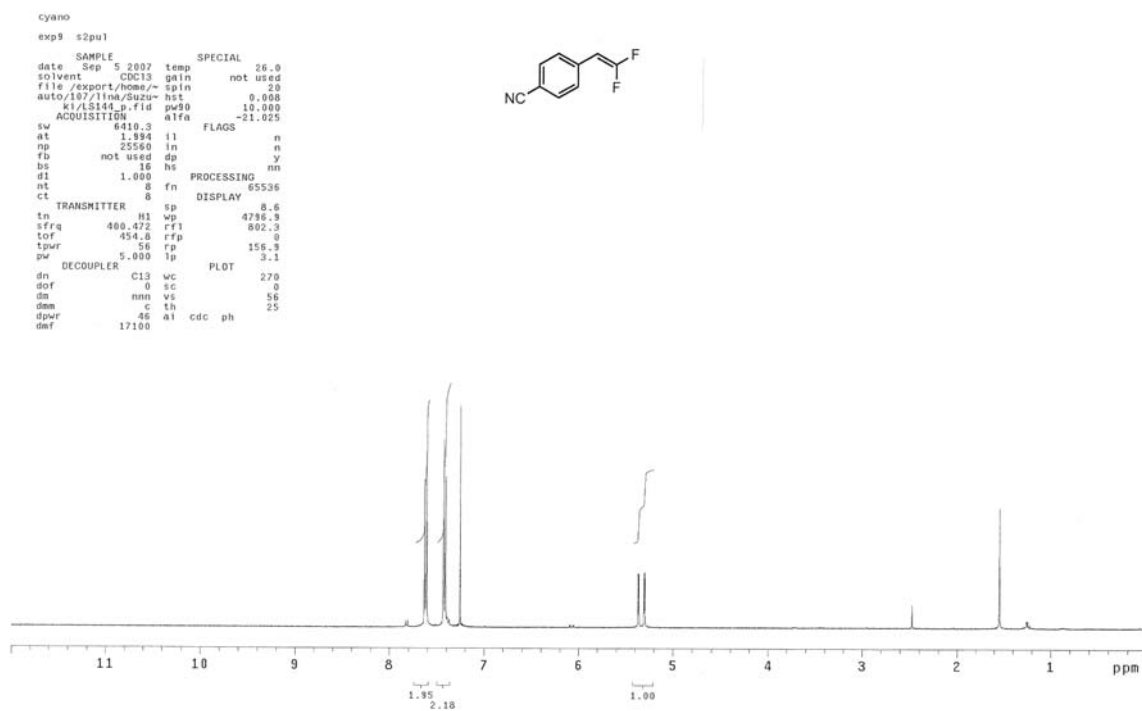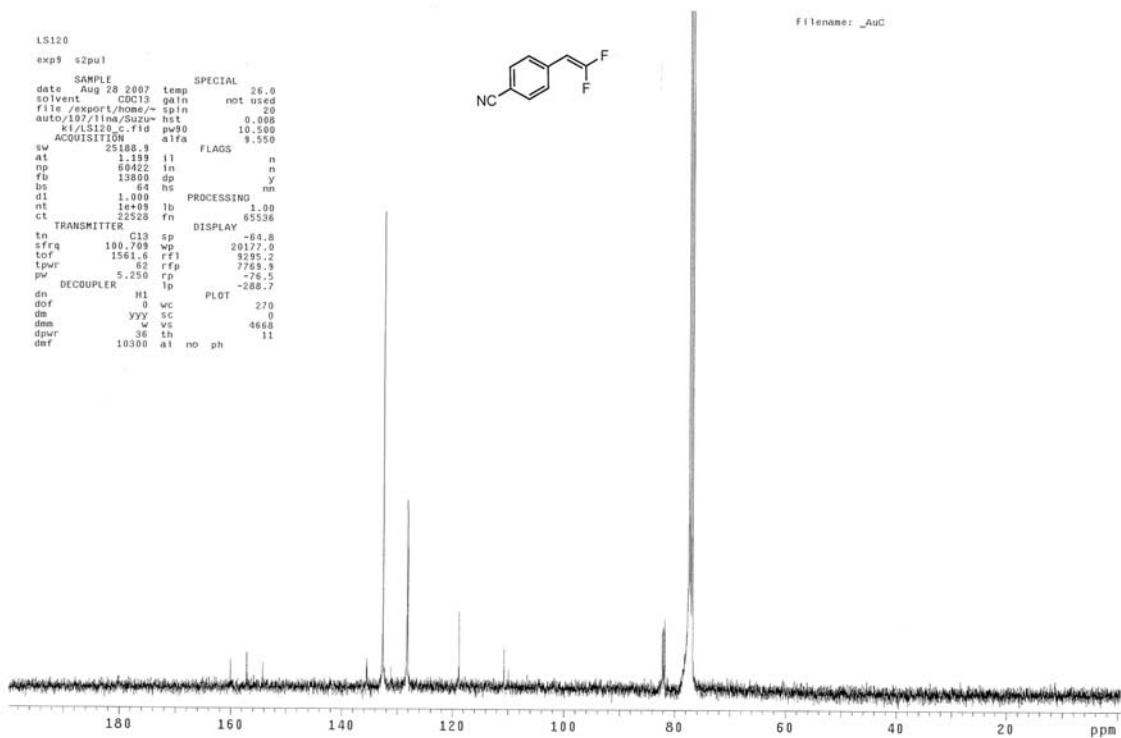

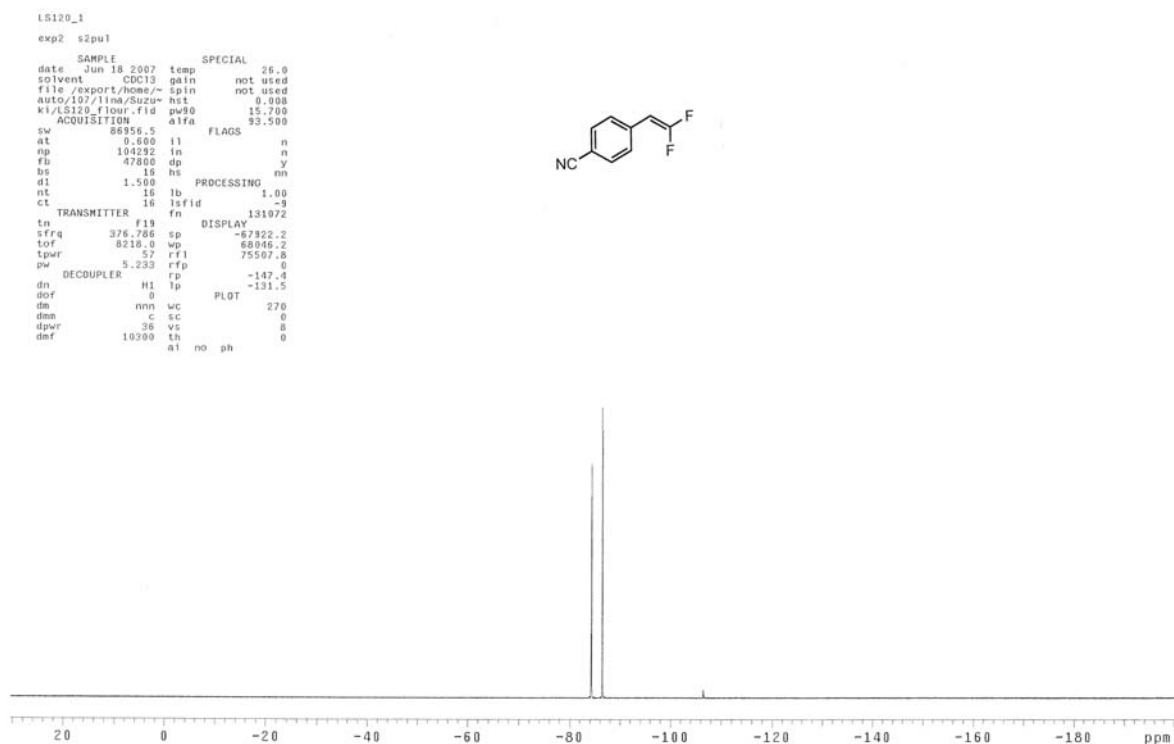

## Compound 19

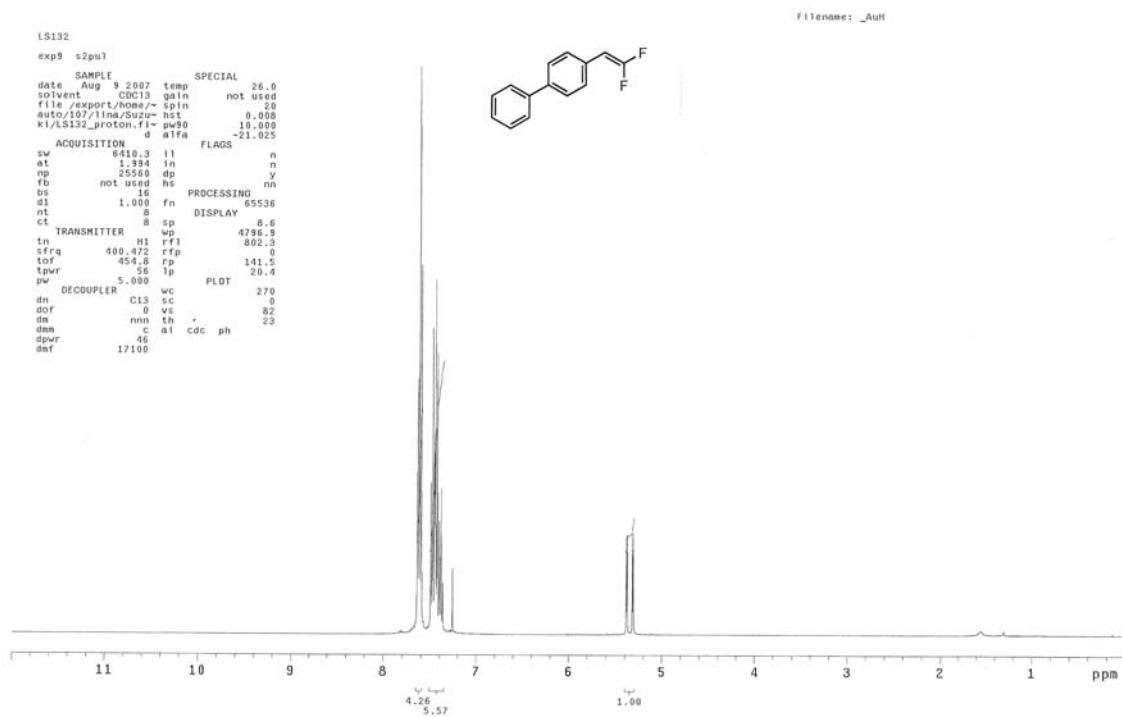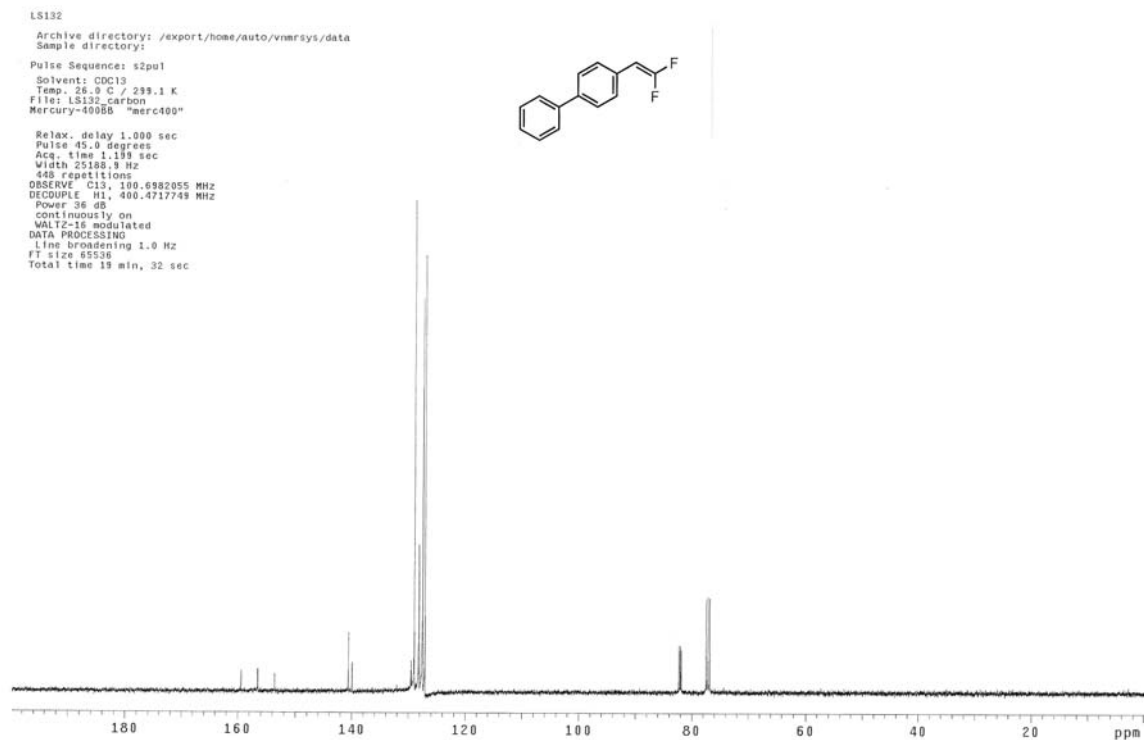

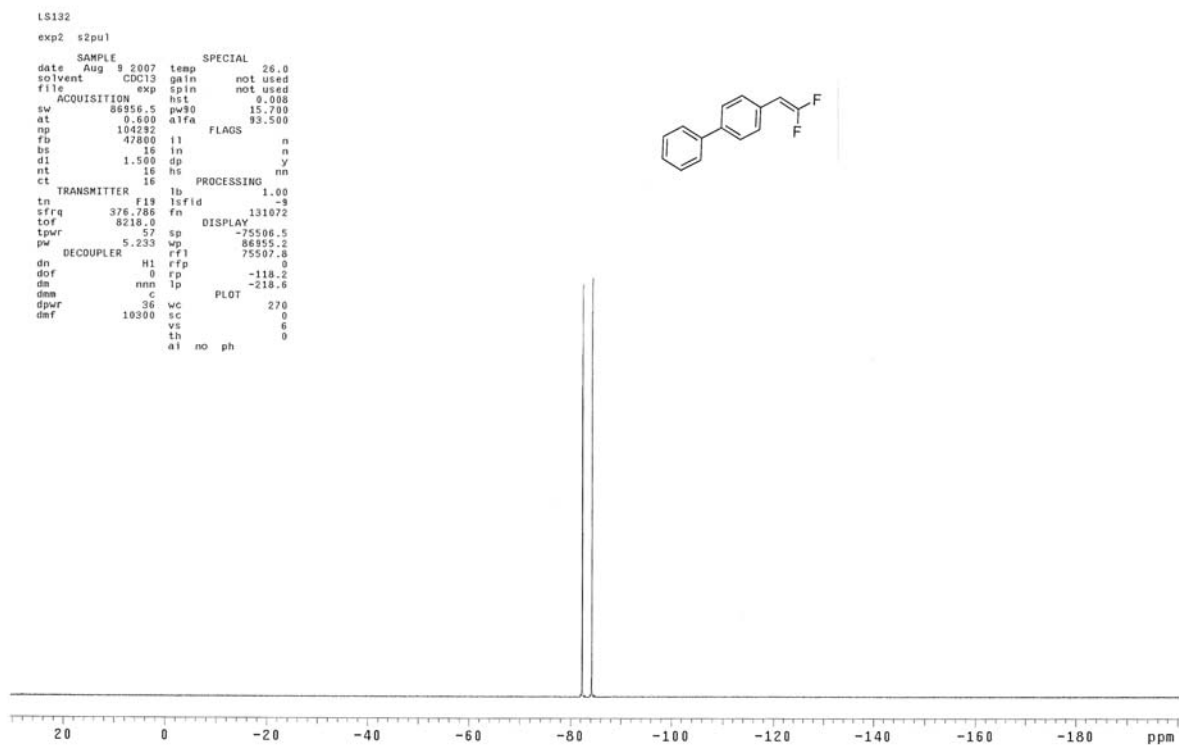

## Compound 20

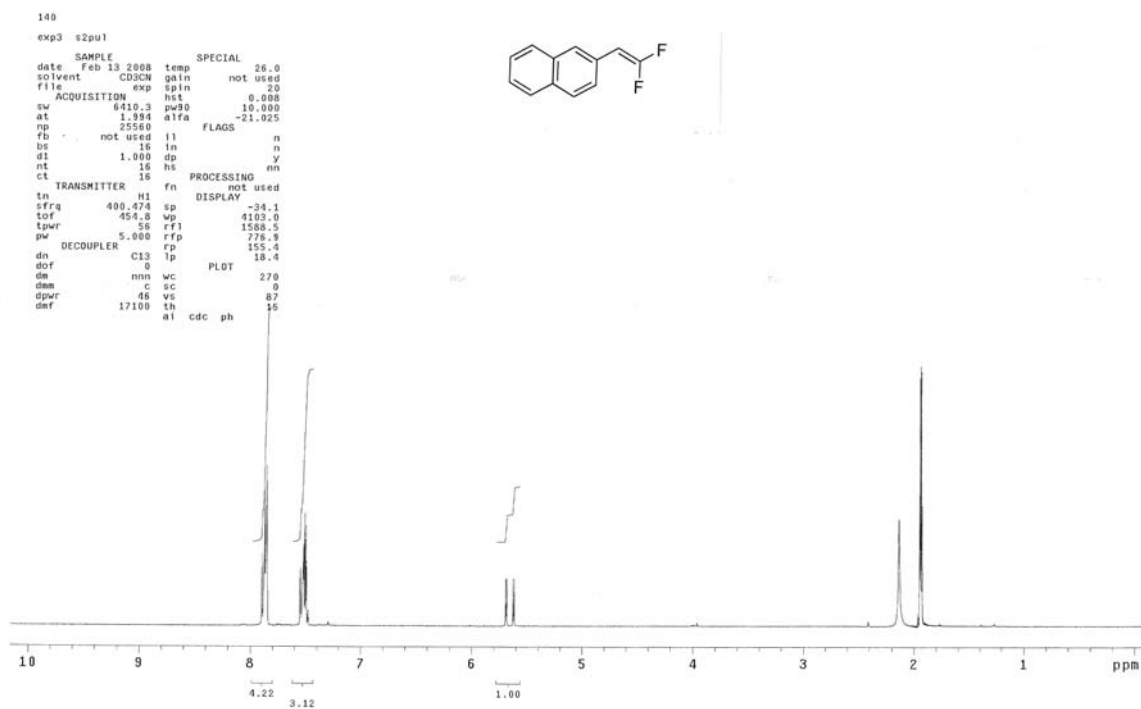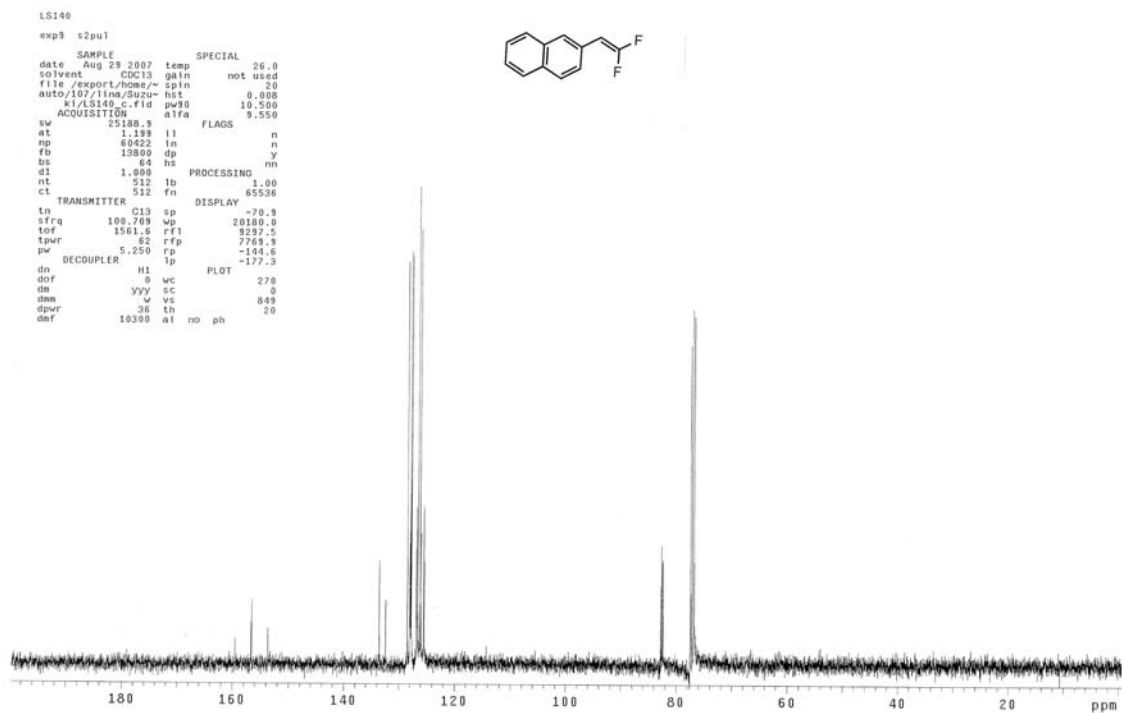

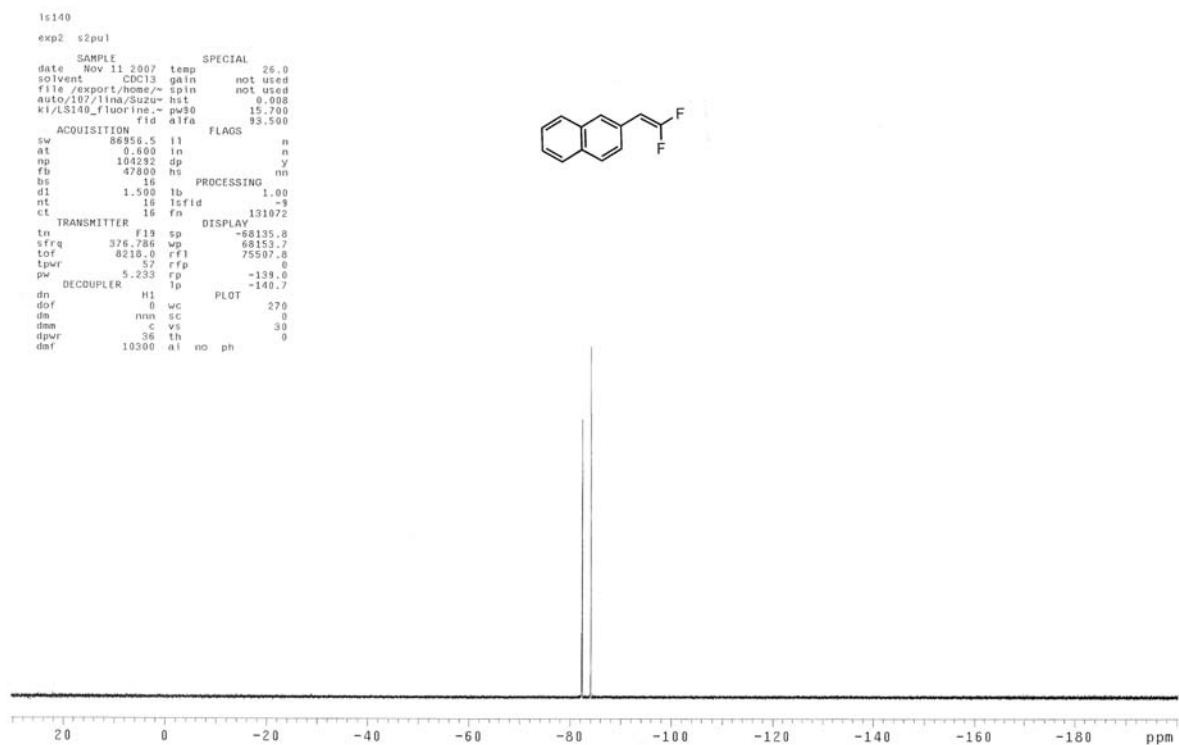

## Compound 21

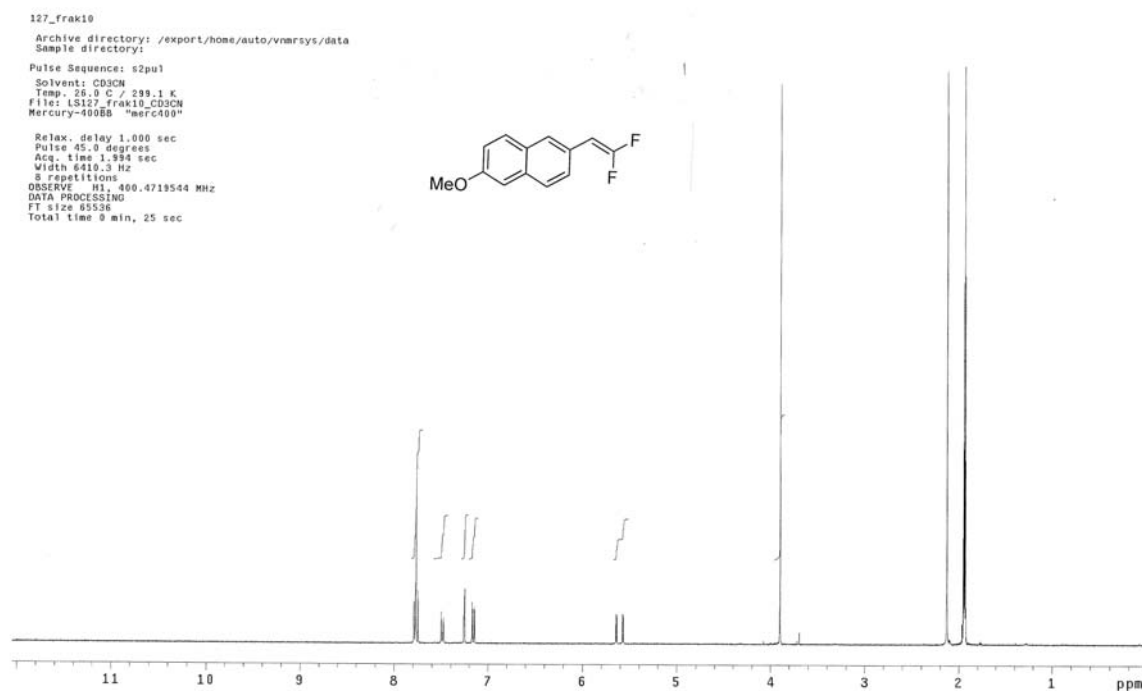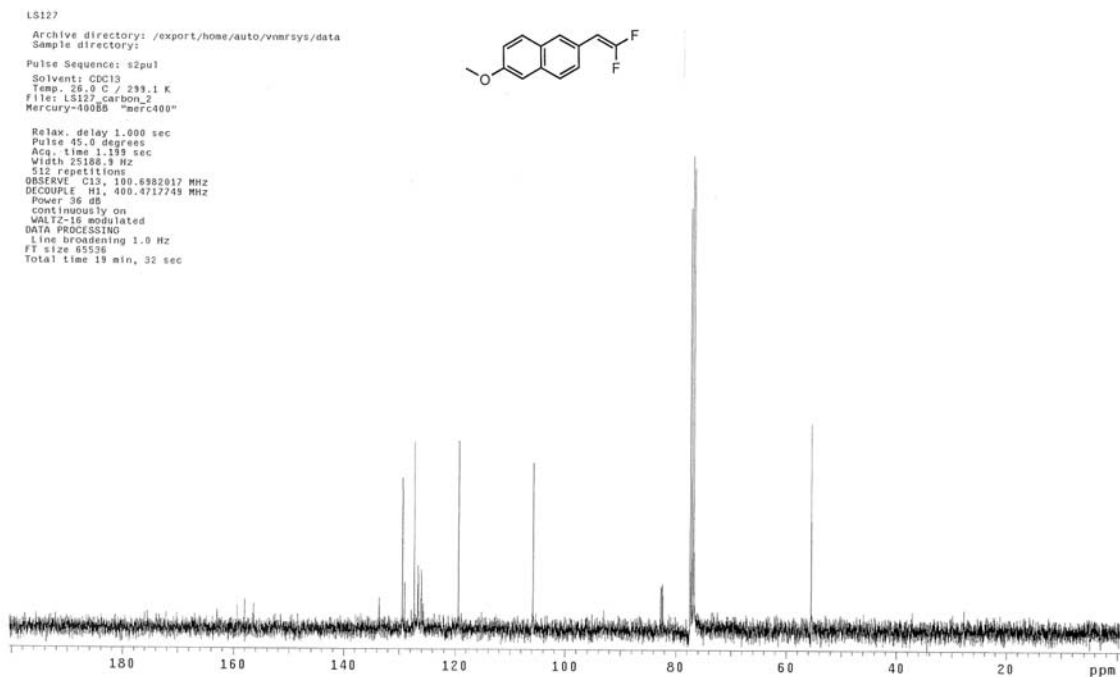



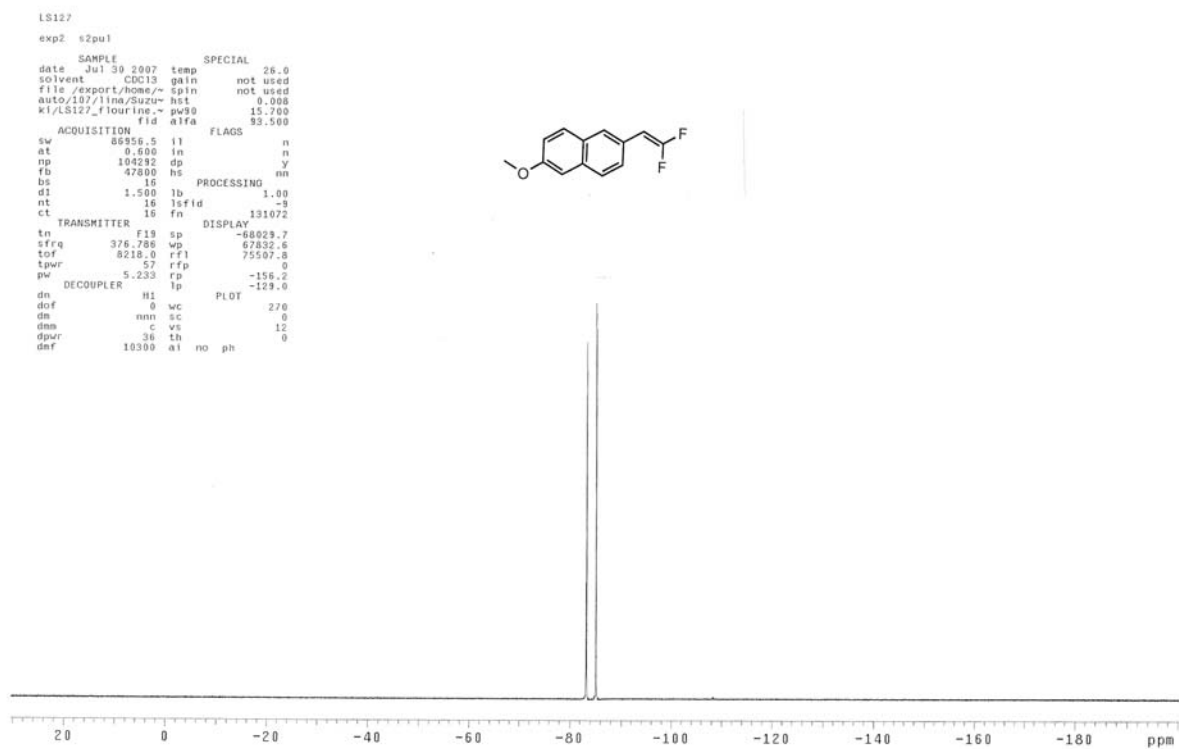

## Compound 22

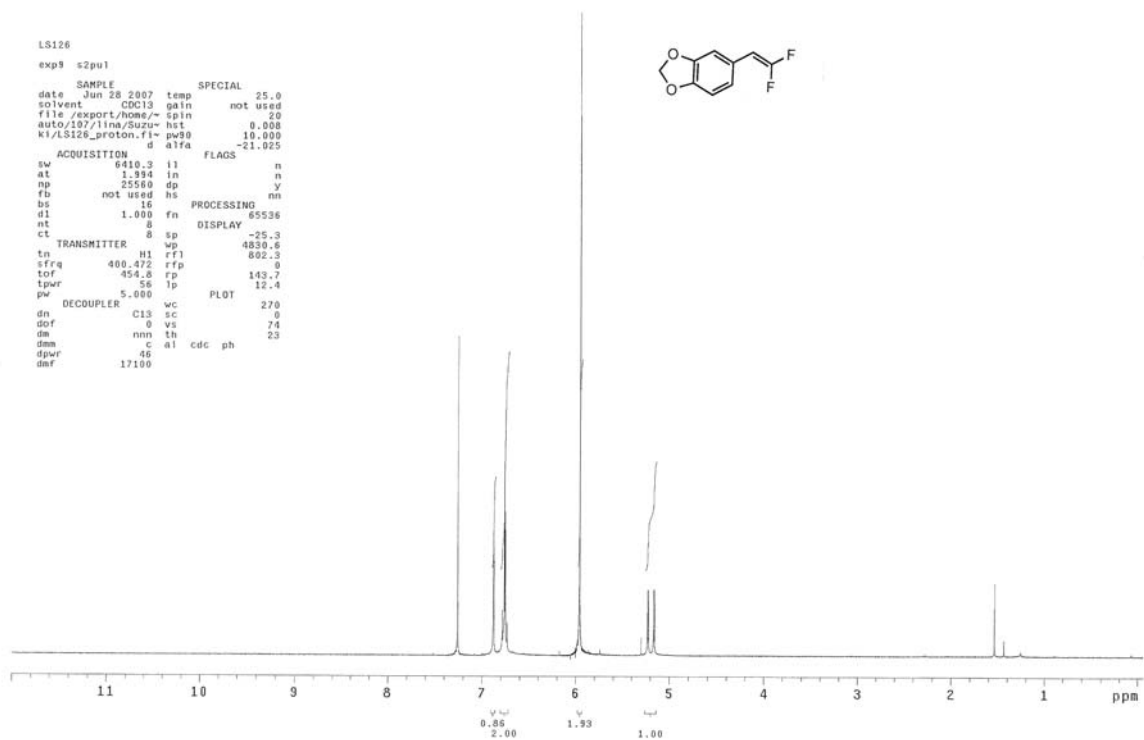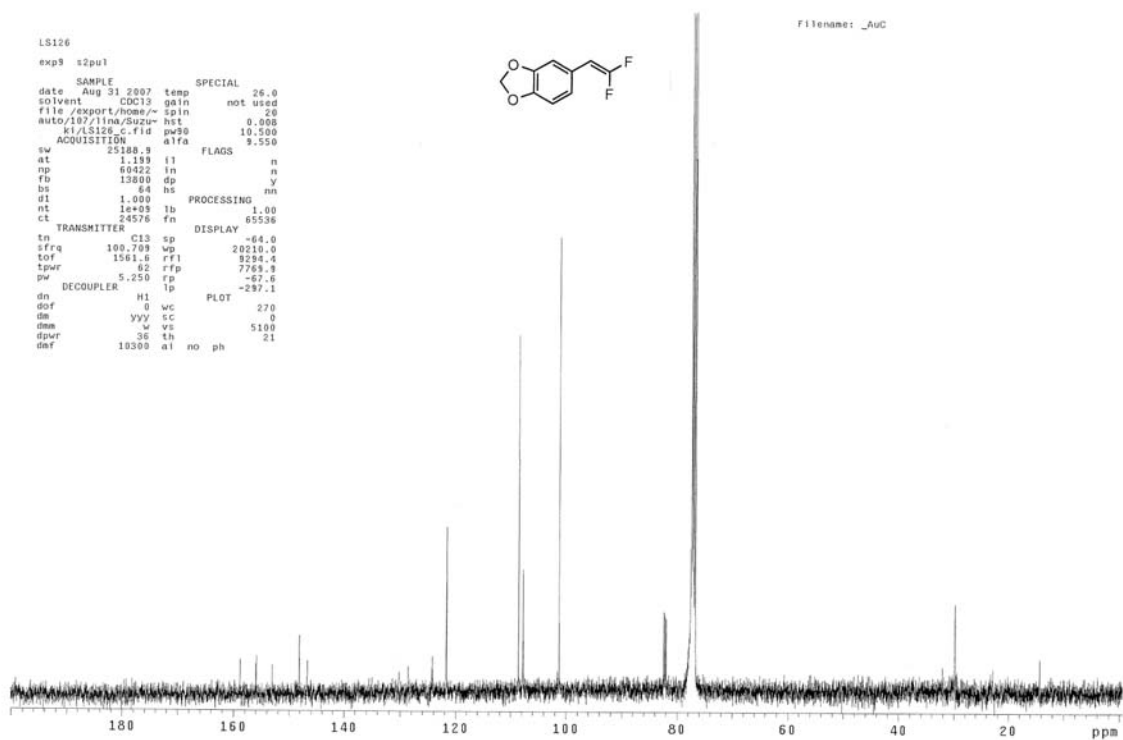

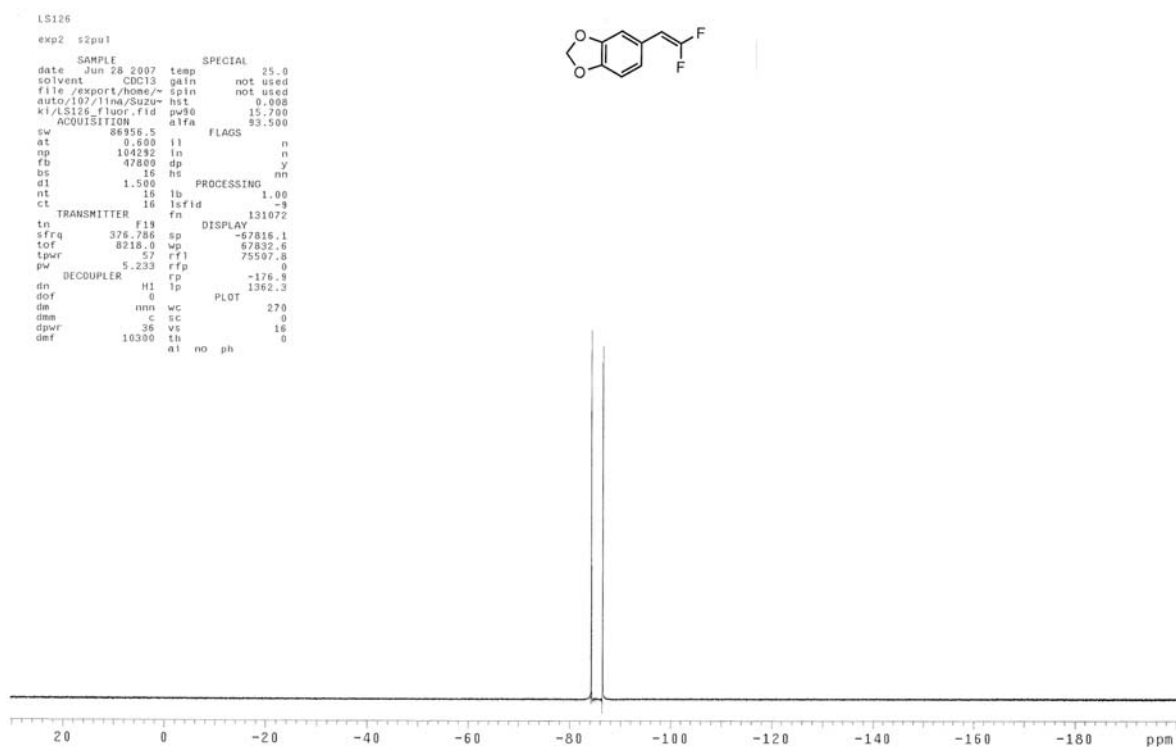

## Compound 23

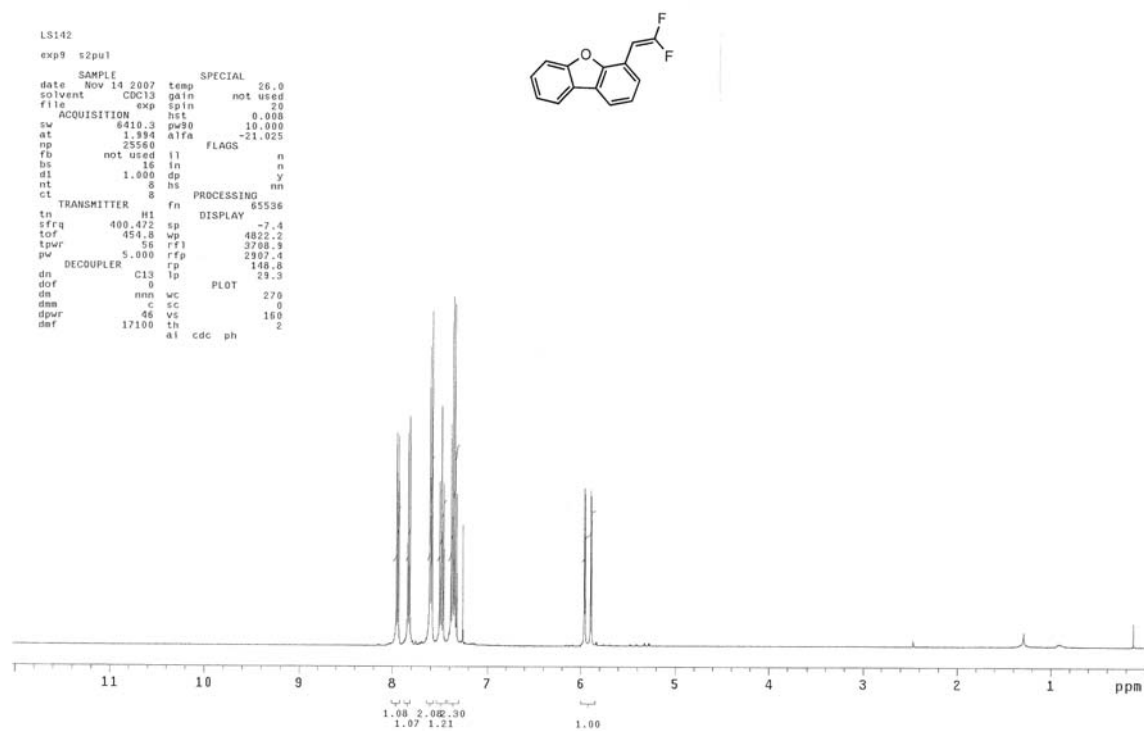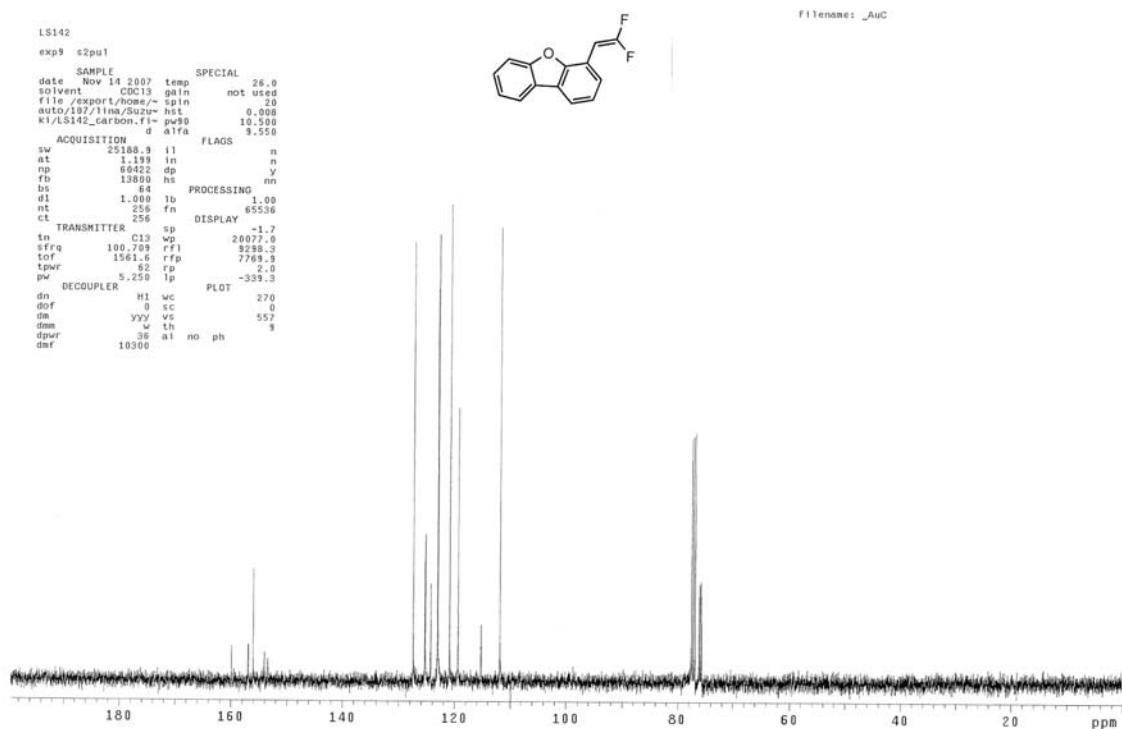

S21

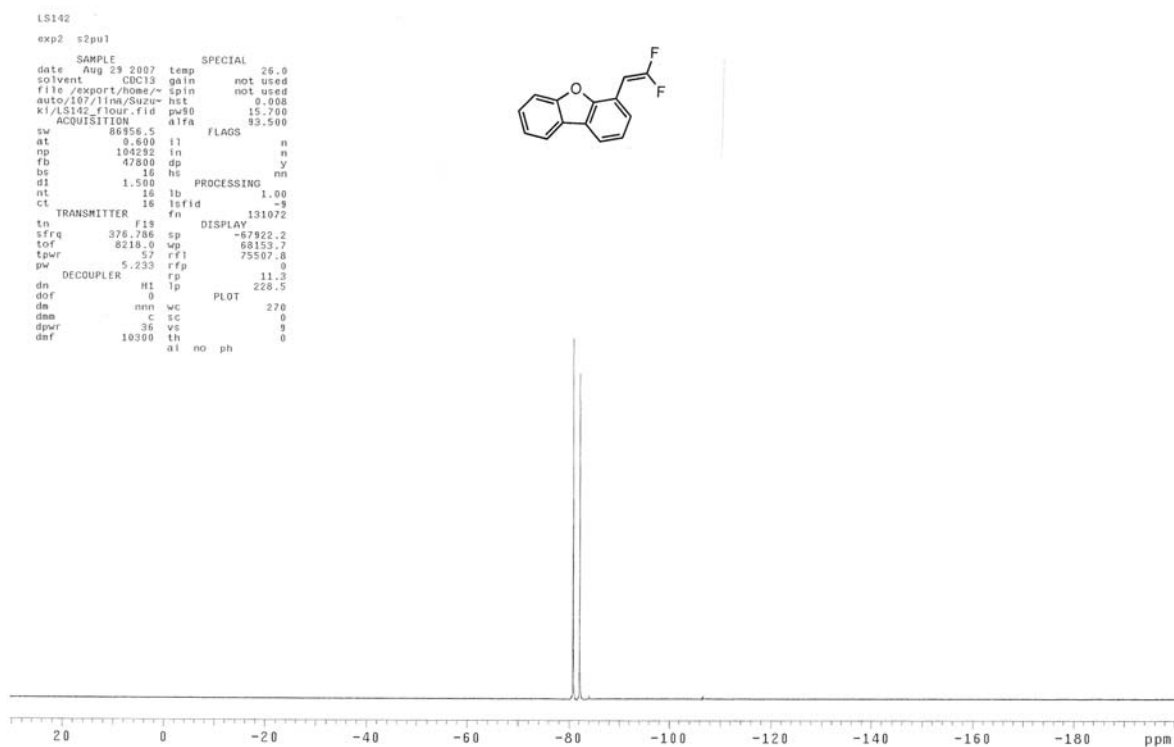

## Compound 24

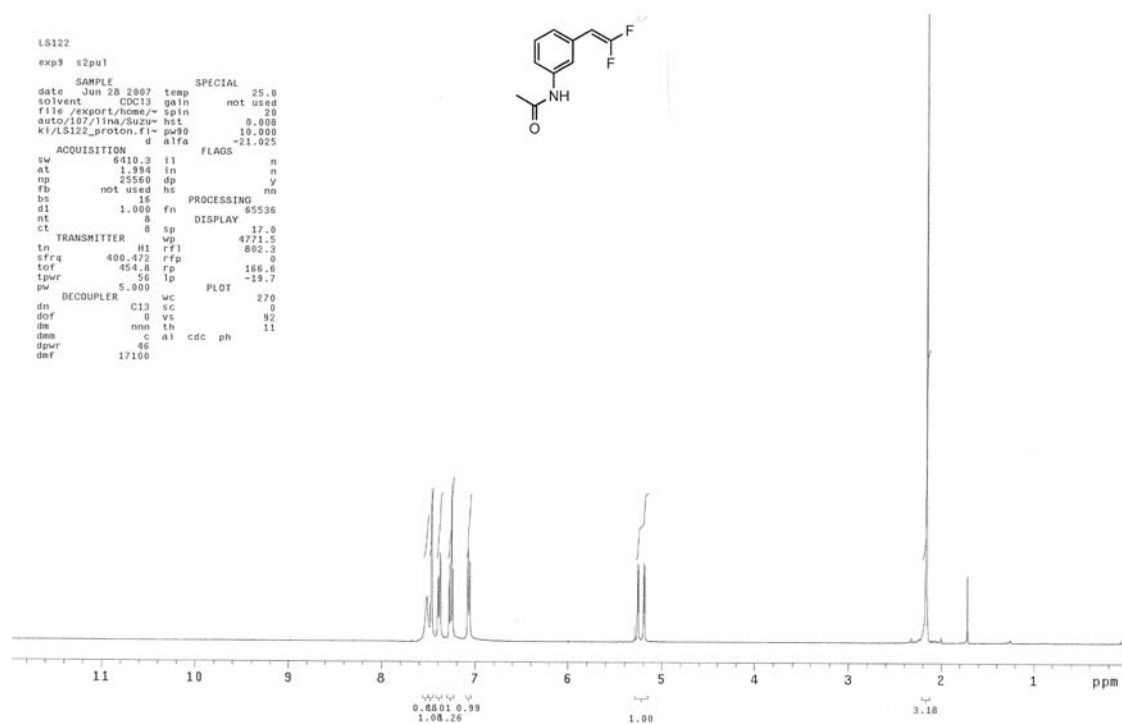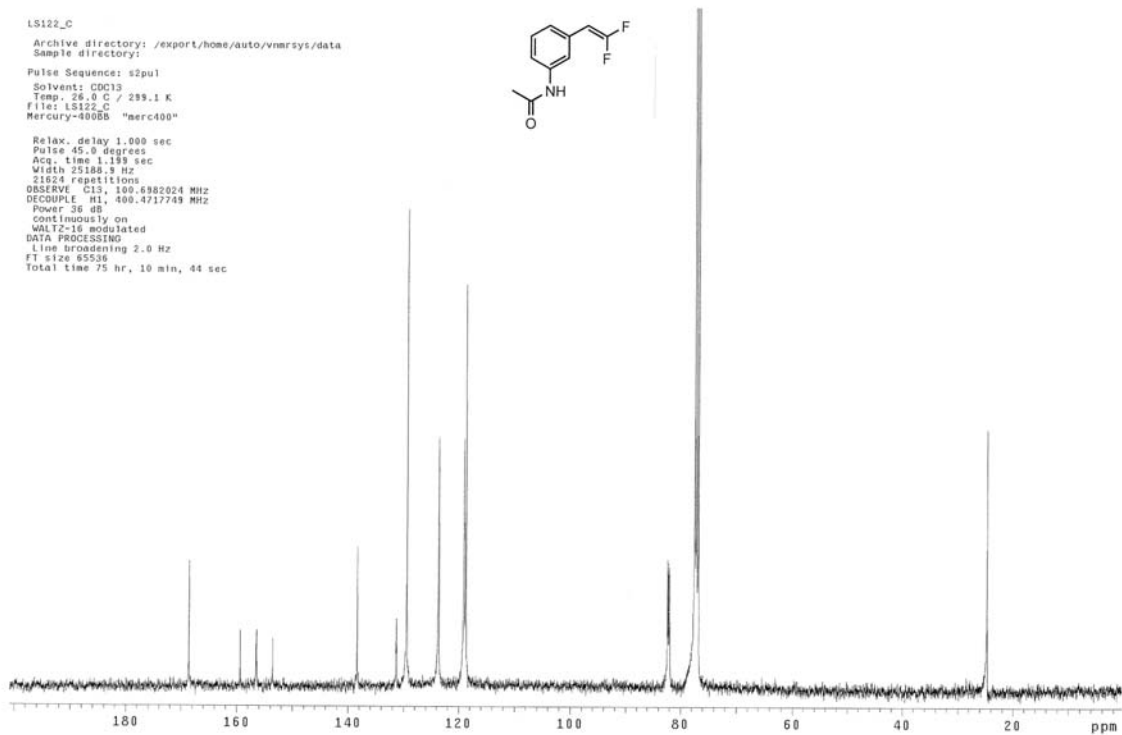

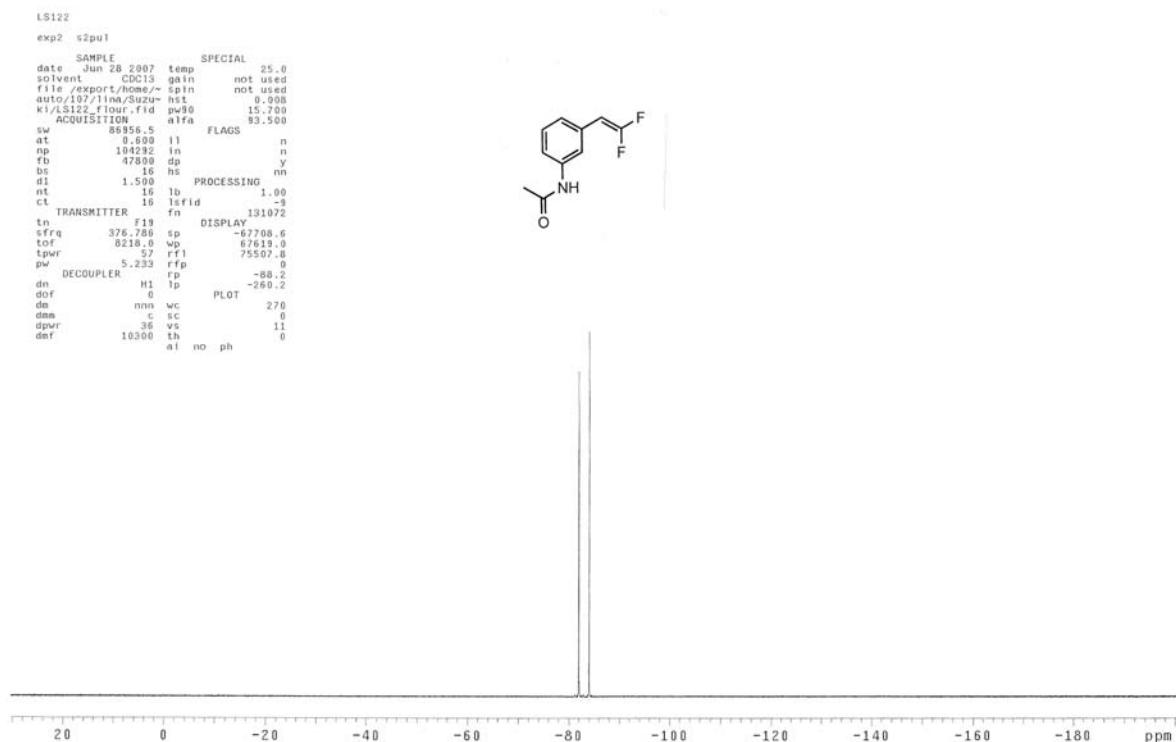

## Compound 25

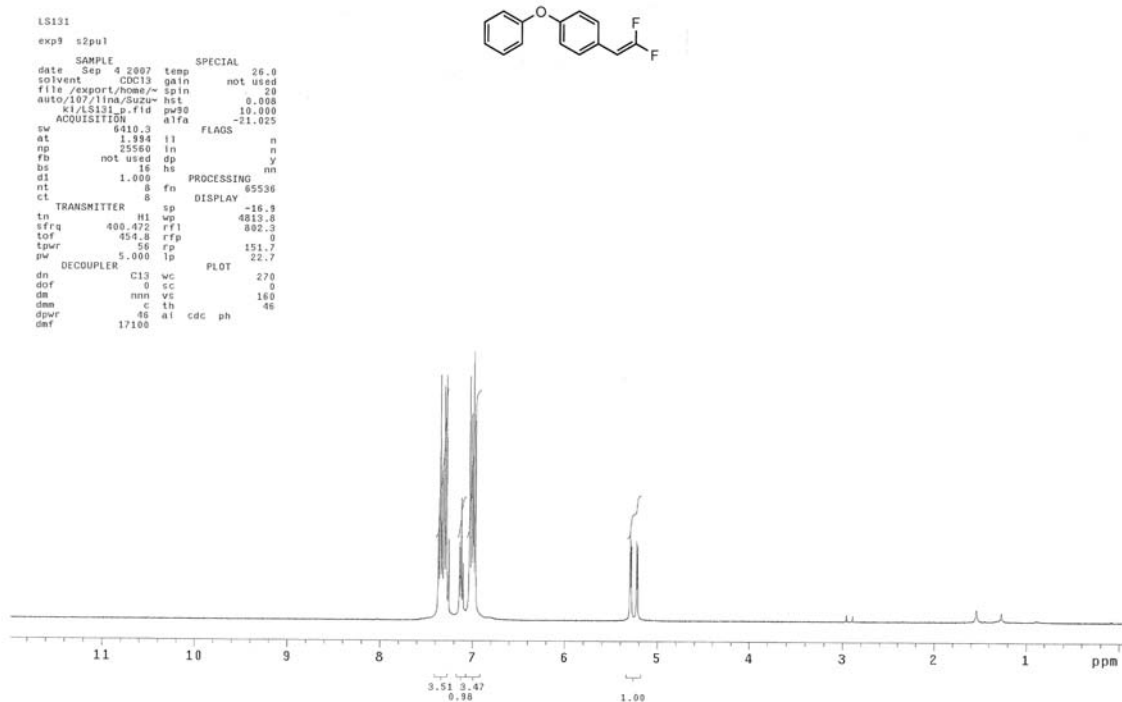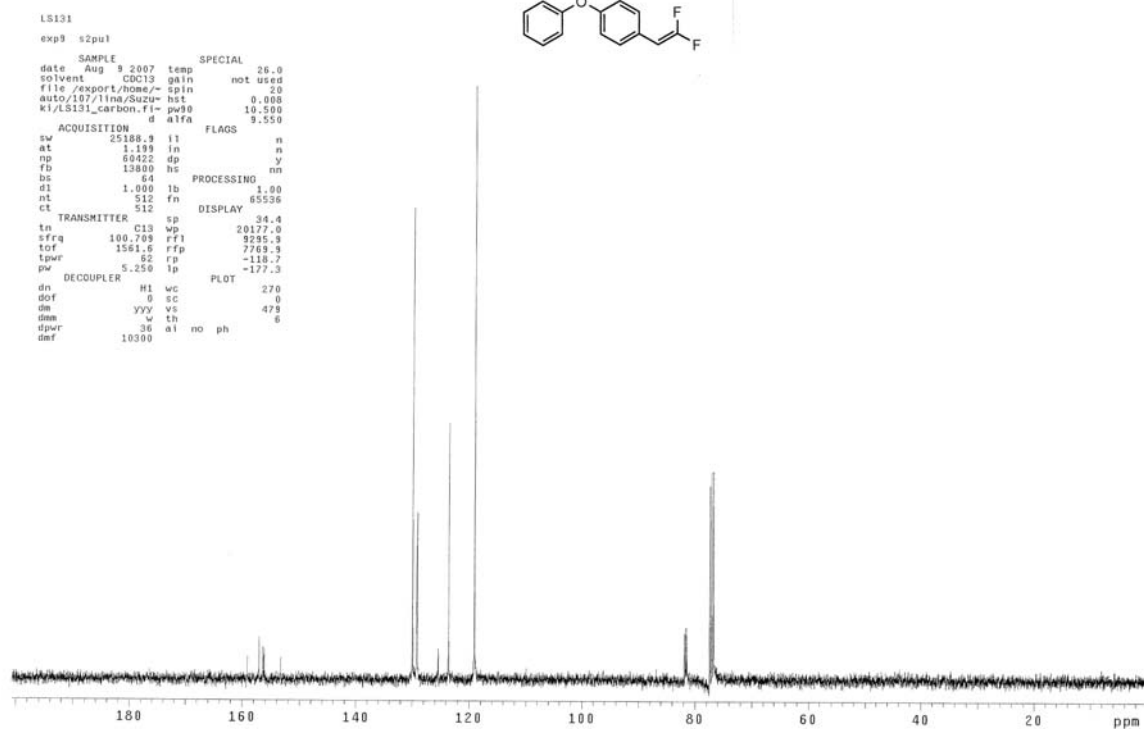



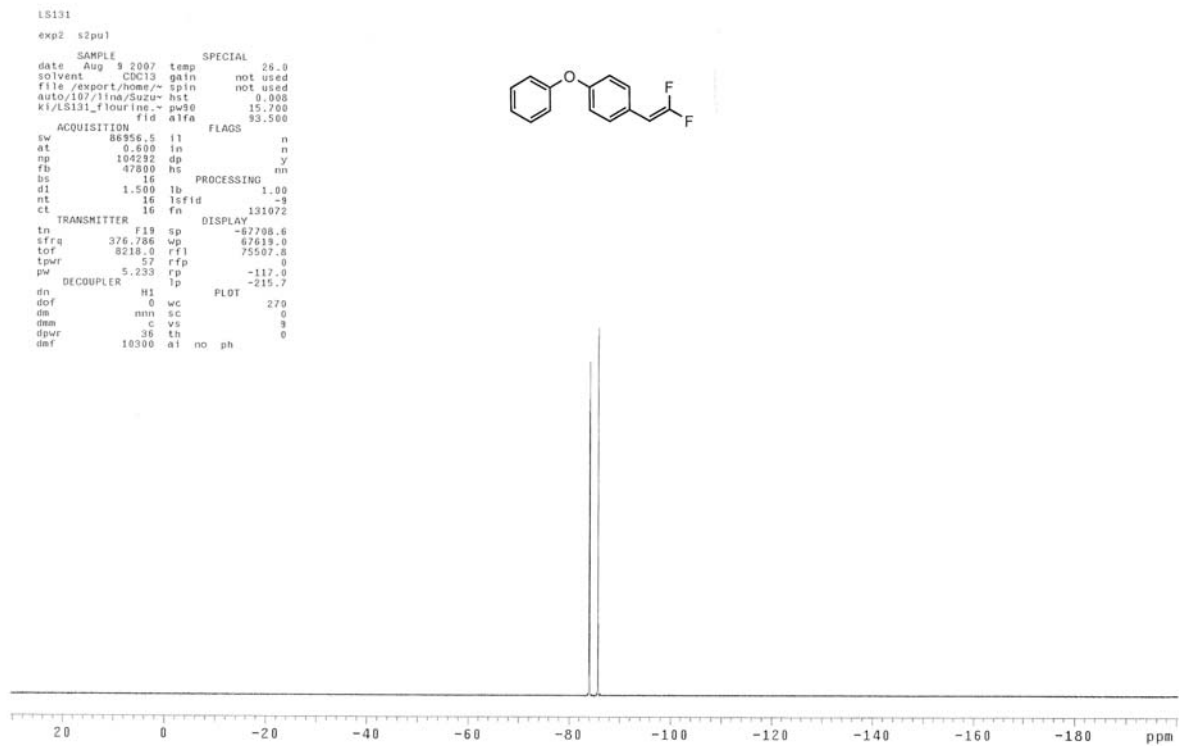

## Compound 26

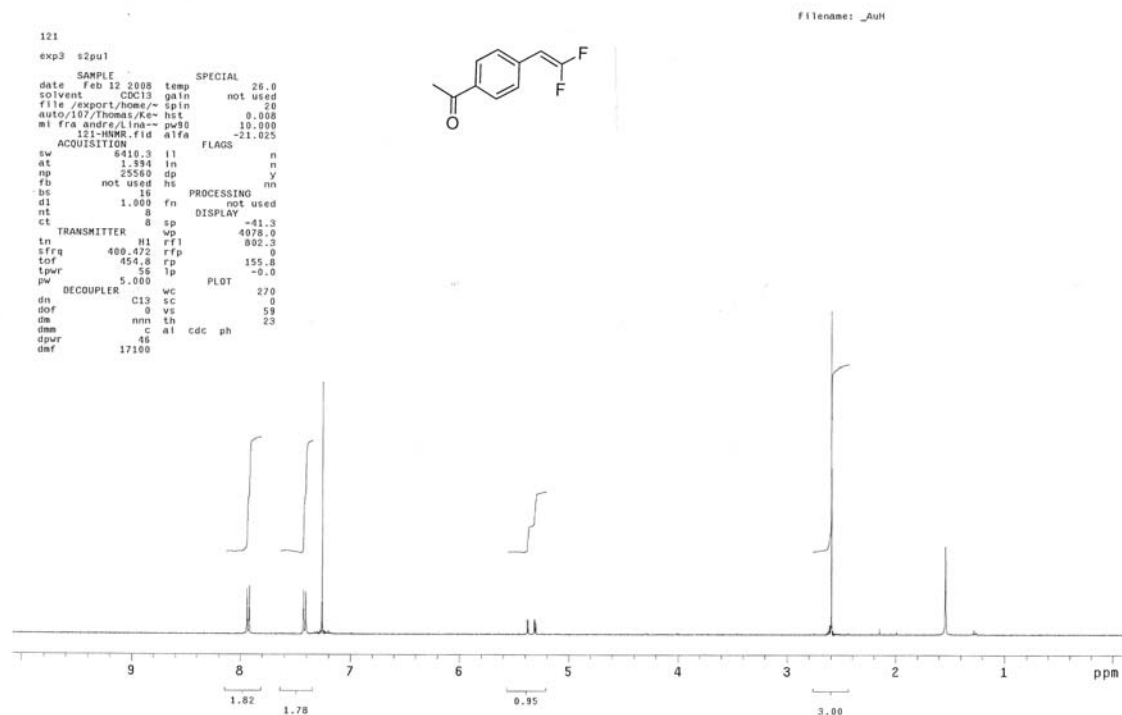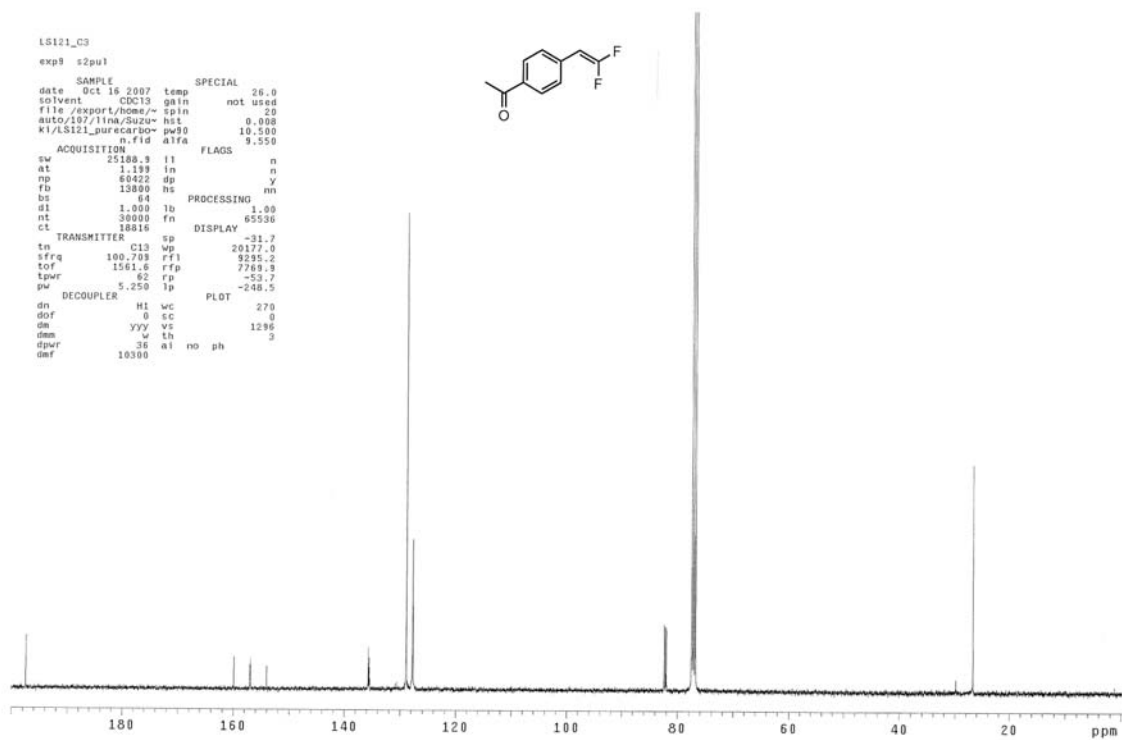

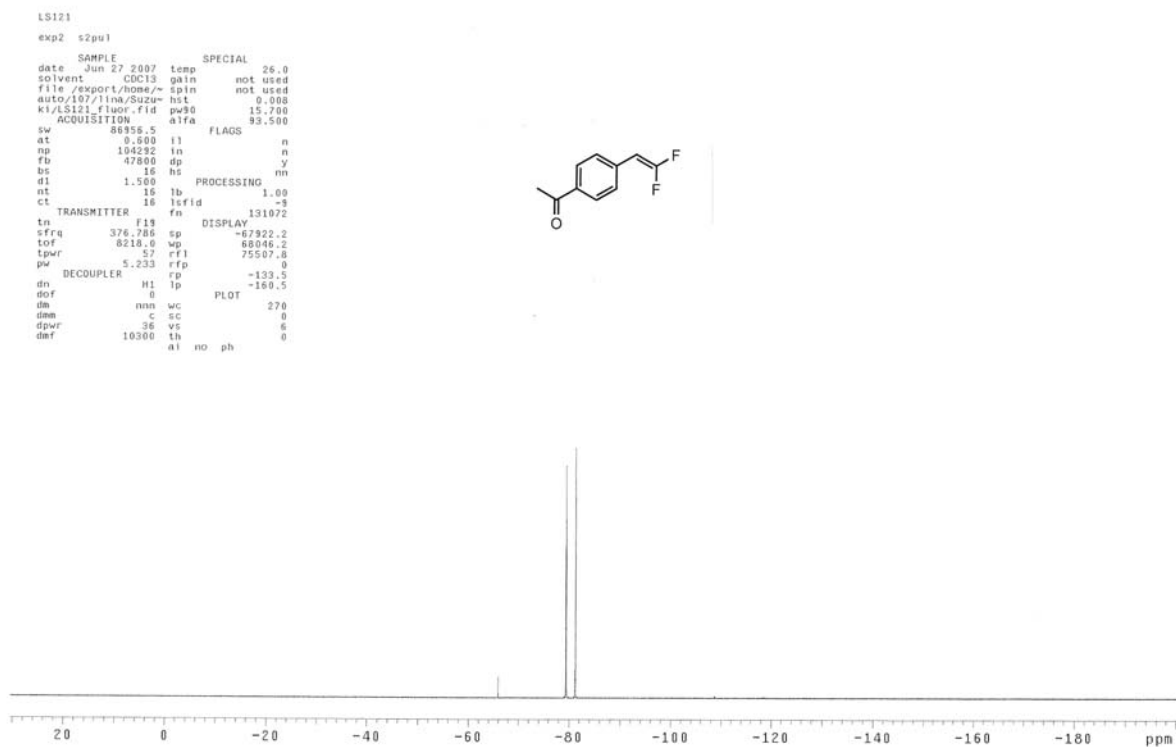

## Compound 27

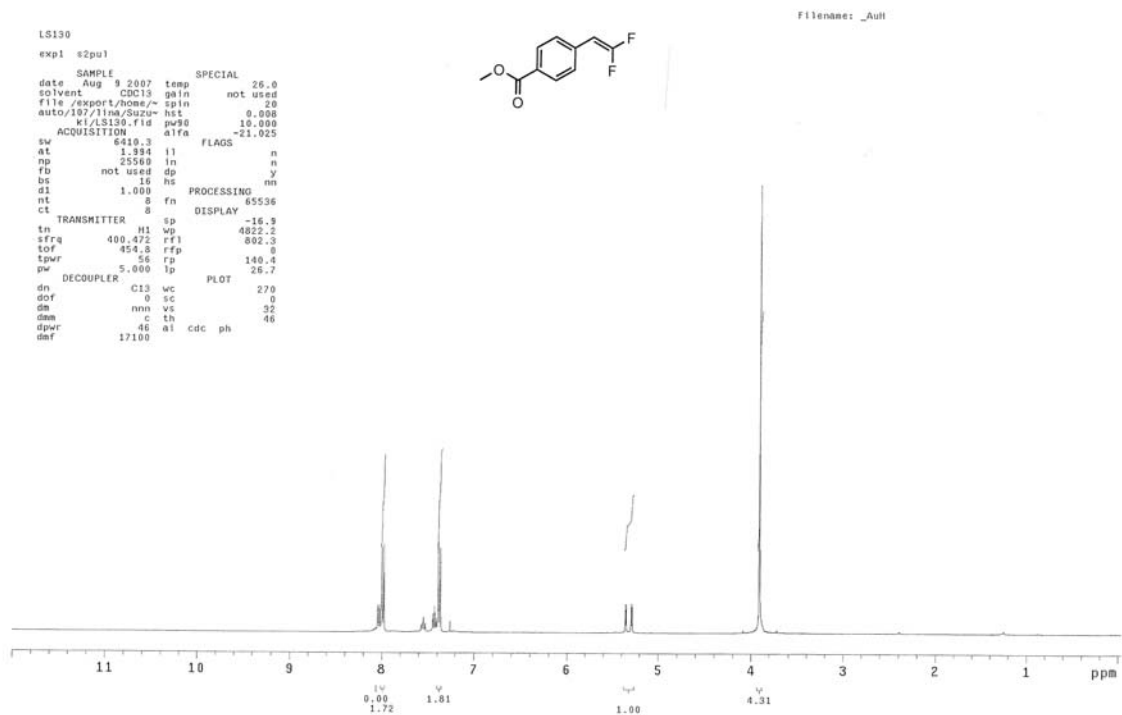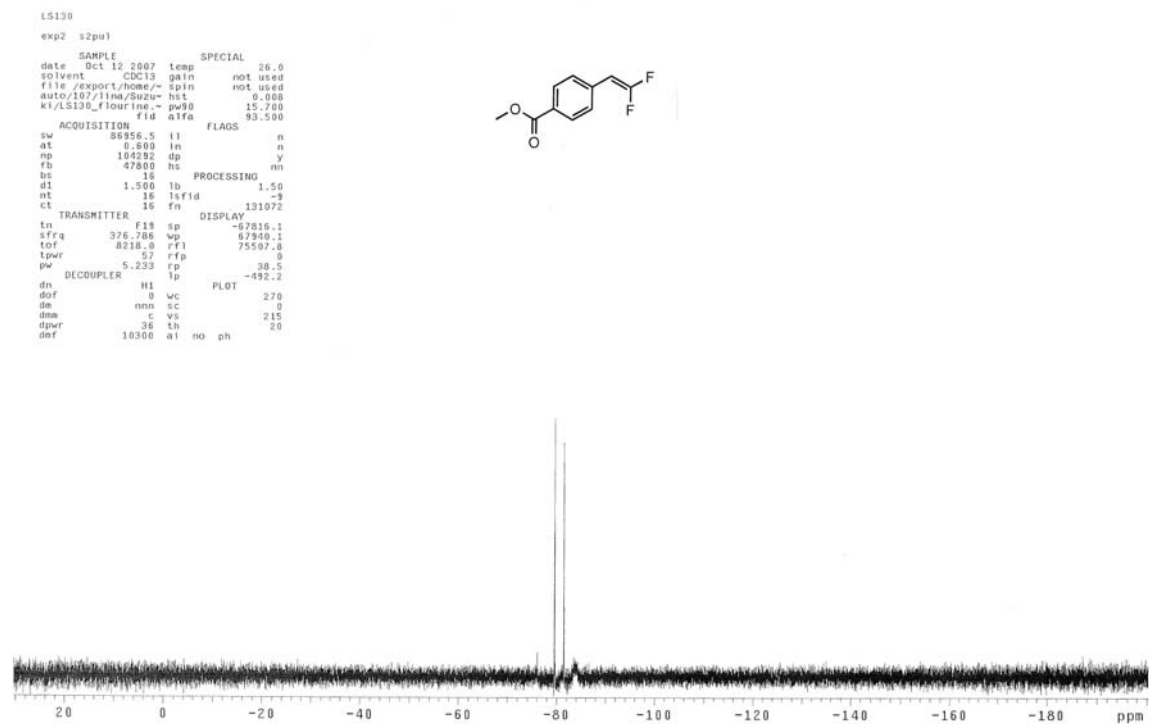

## Compound 28

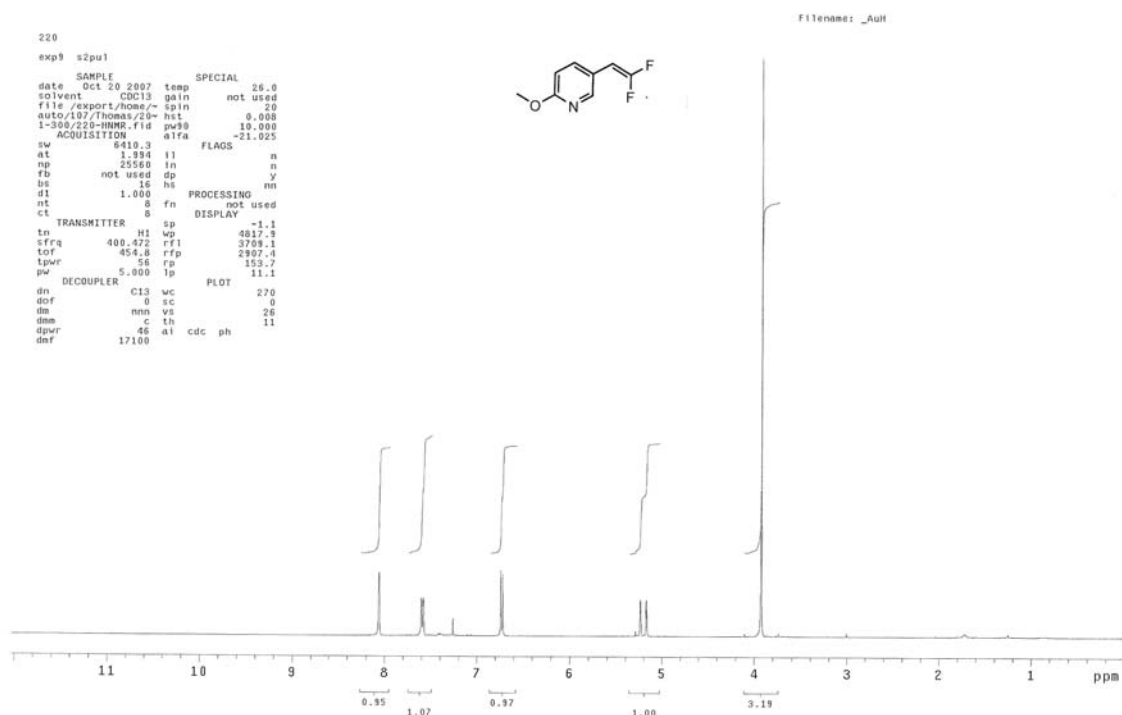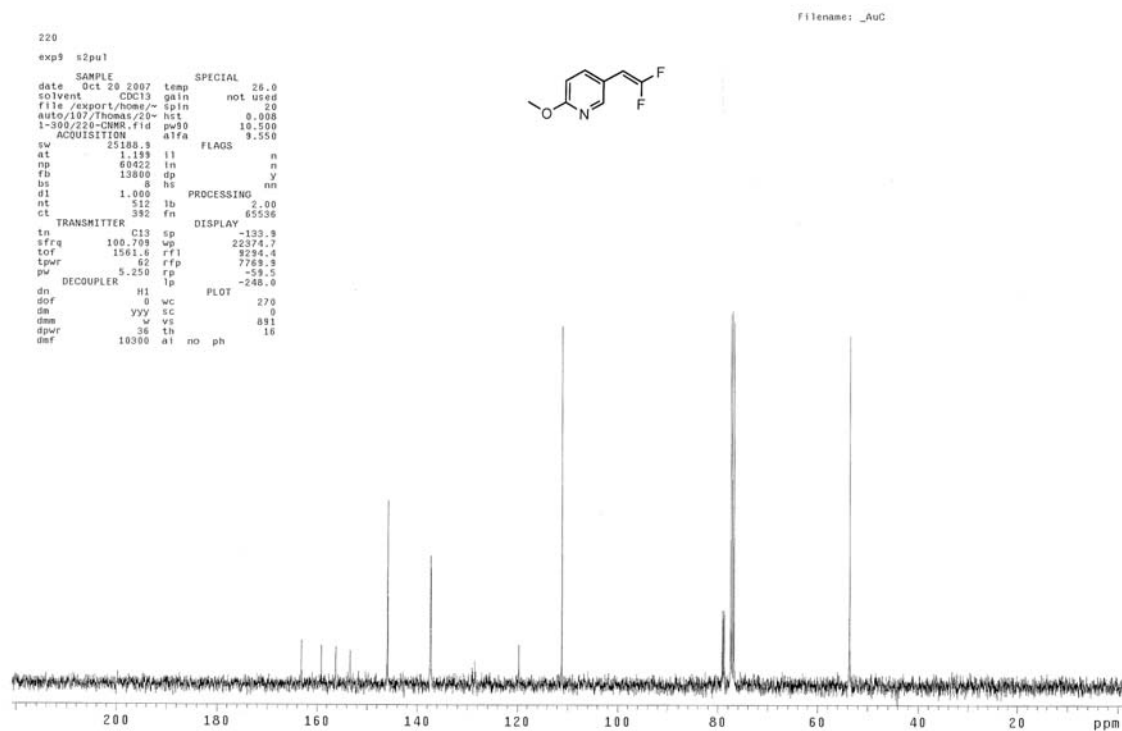

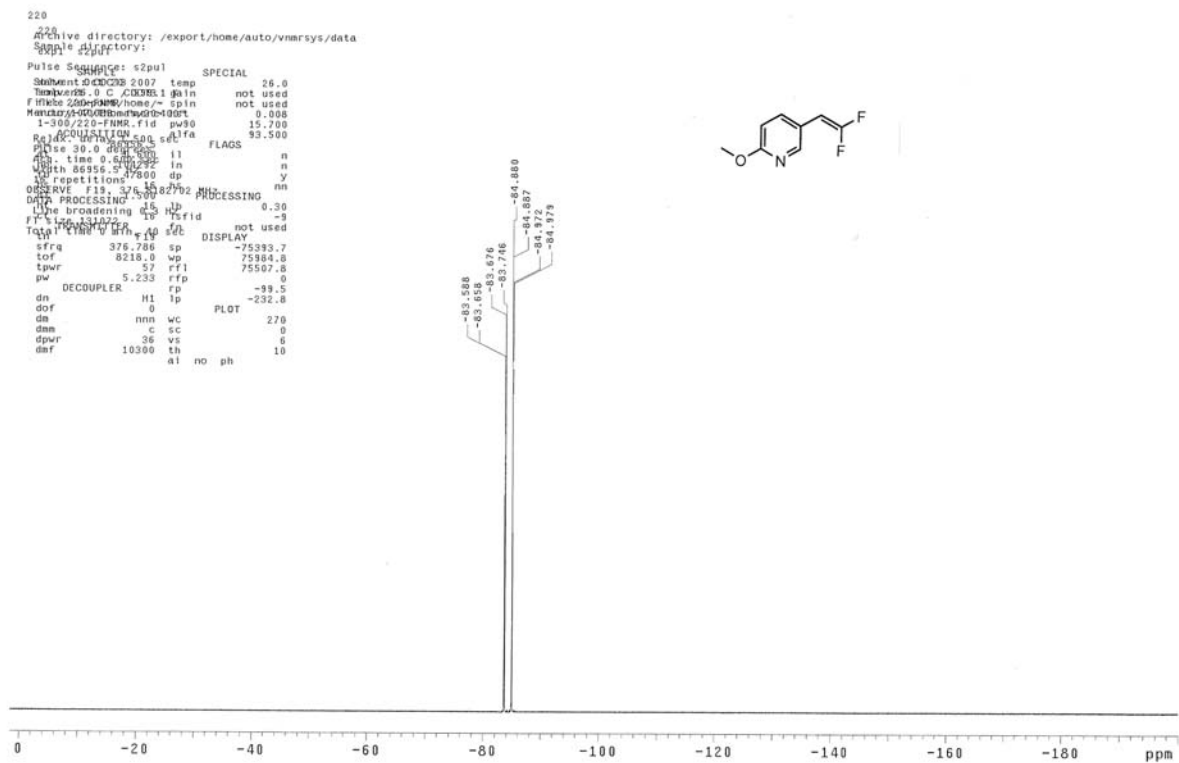

## Compound 29

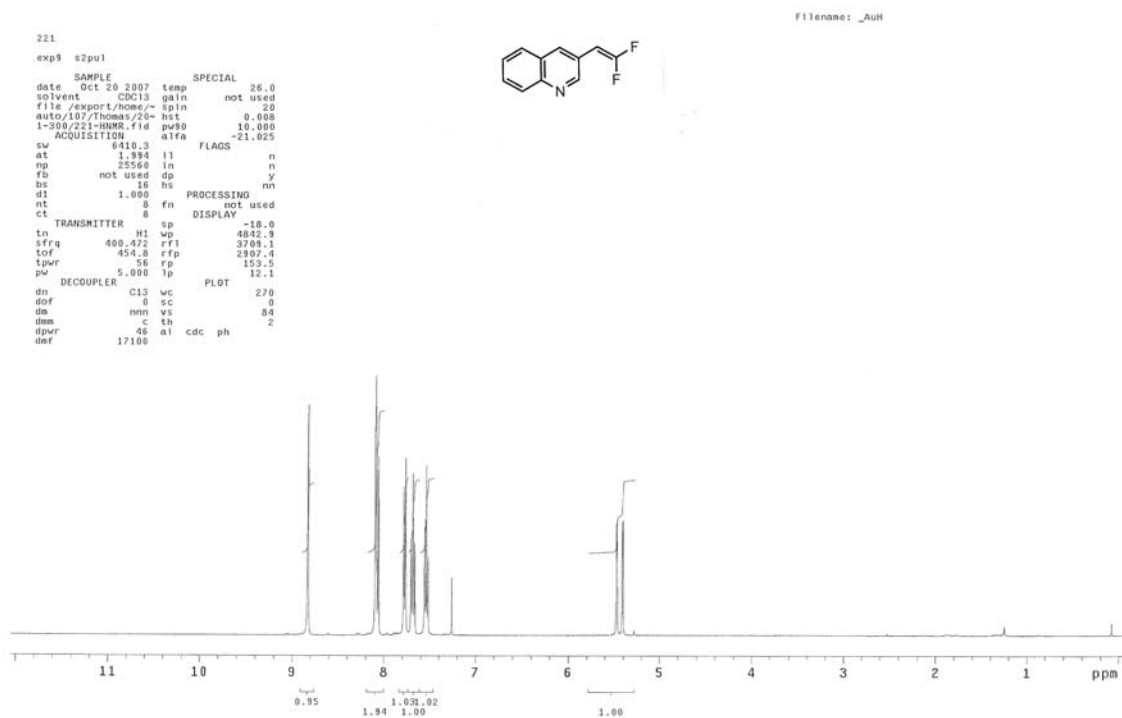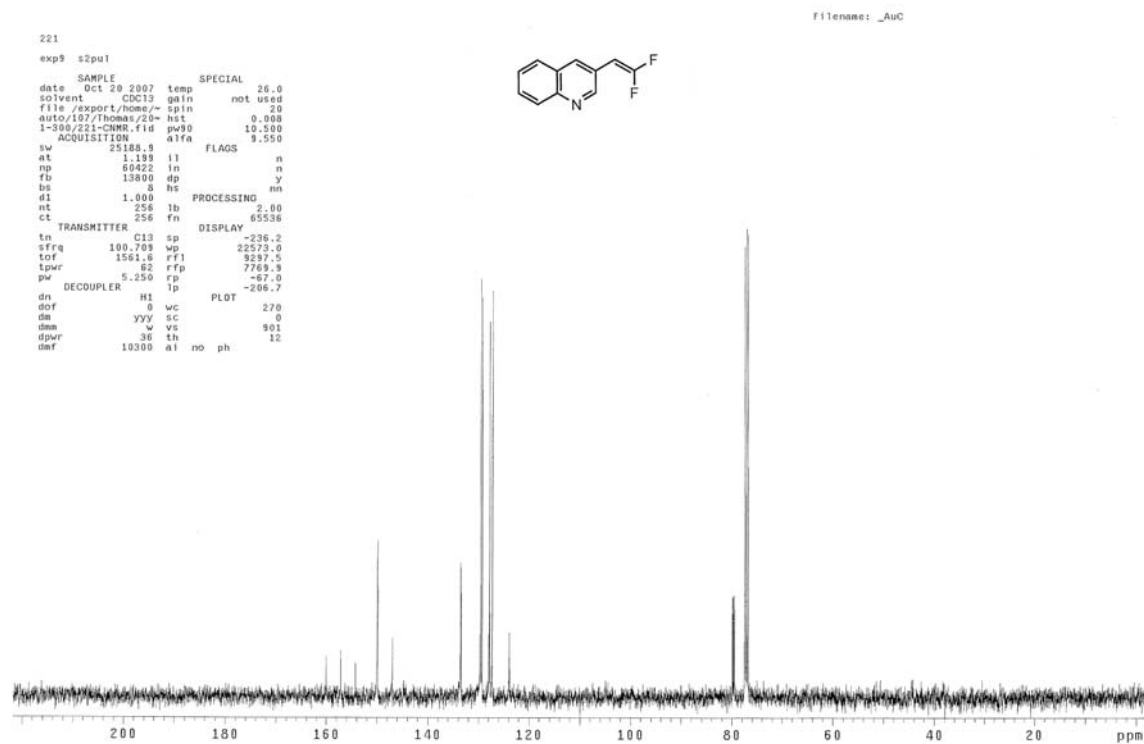

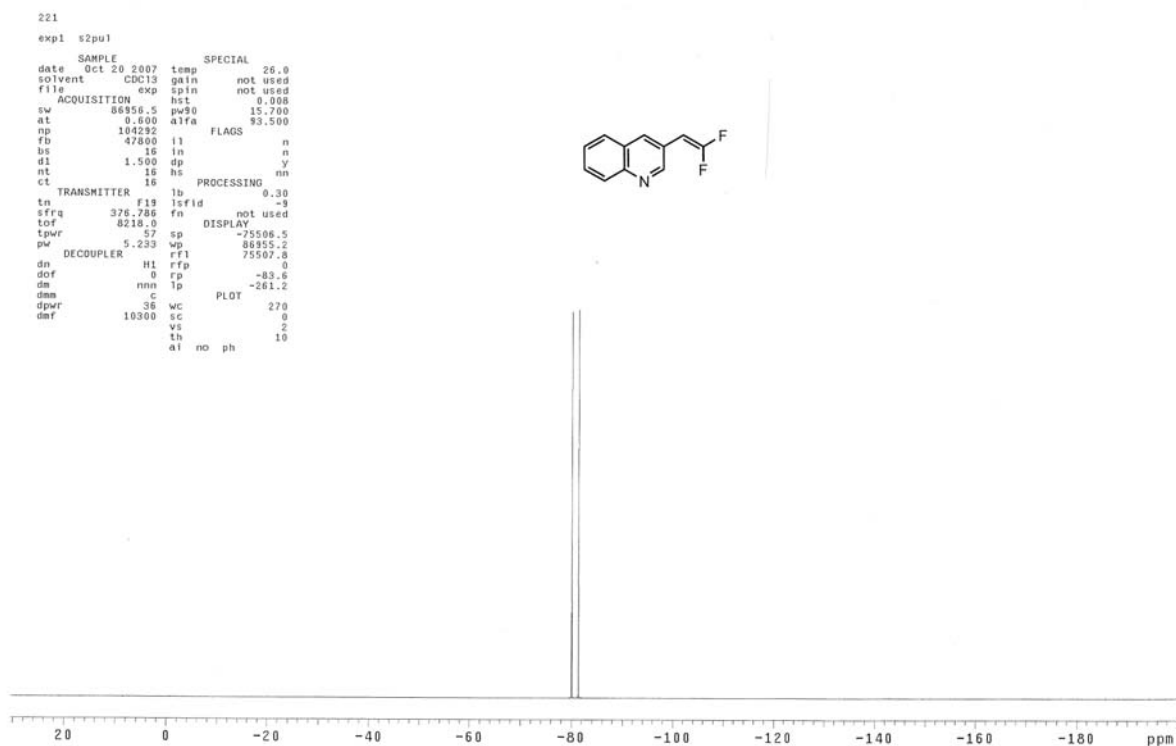

Supplement: Supplementary file 1 [file 4639801]
